# Supplementary material for: Inferring Homologous Recombination Deficiency of Ovarian Cancer From the Landscape of Copy Number Variation at Subchromosomal and Genetic Resolutions
Source: Frontiers journal article supplement (doi:10.3389/fonc.2021.772604), 2021-12-16

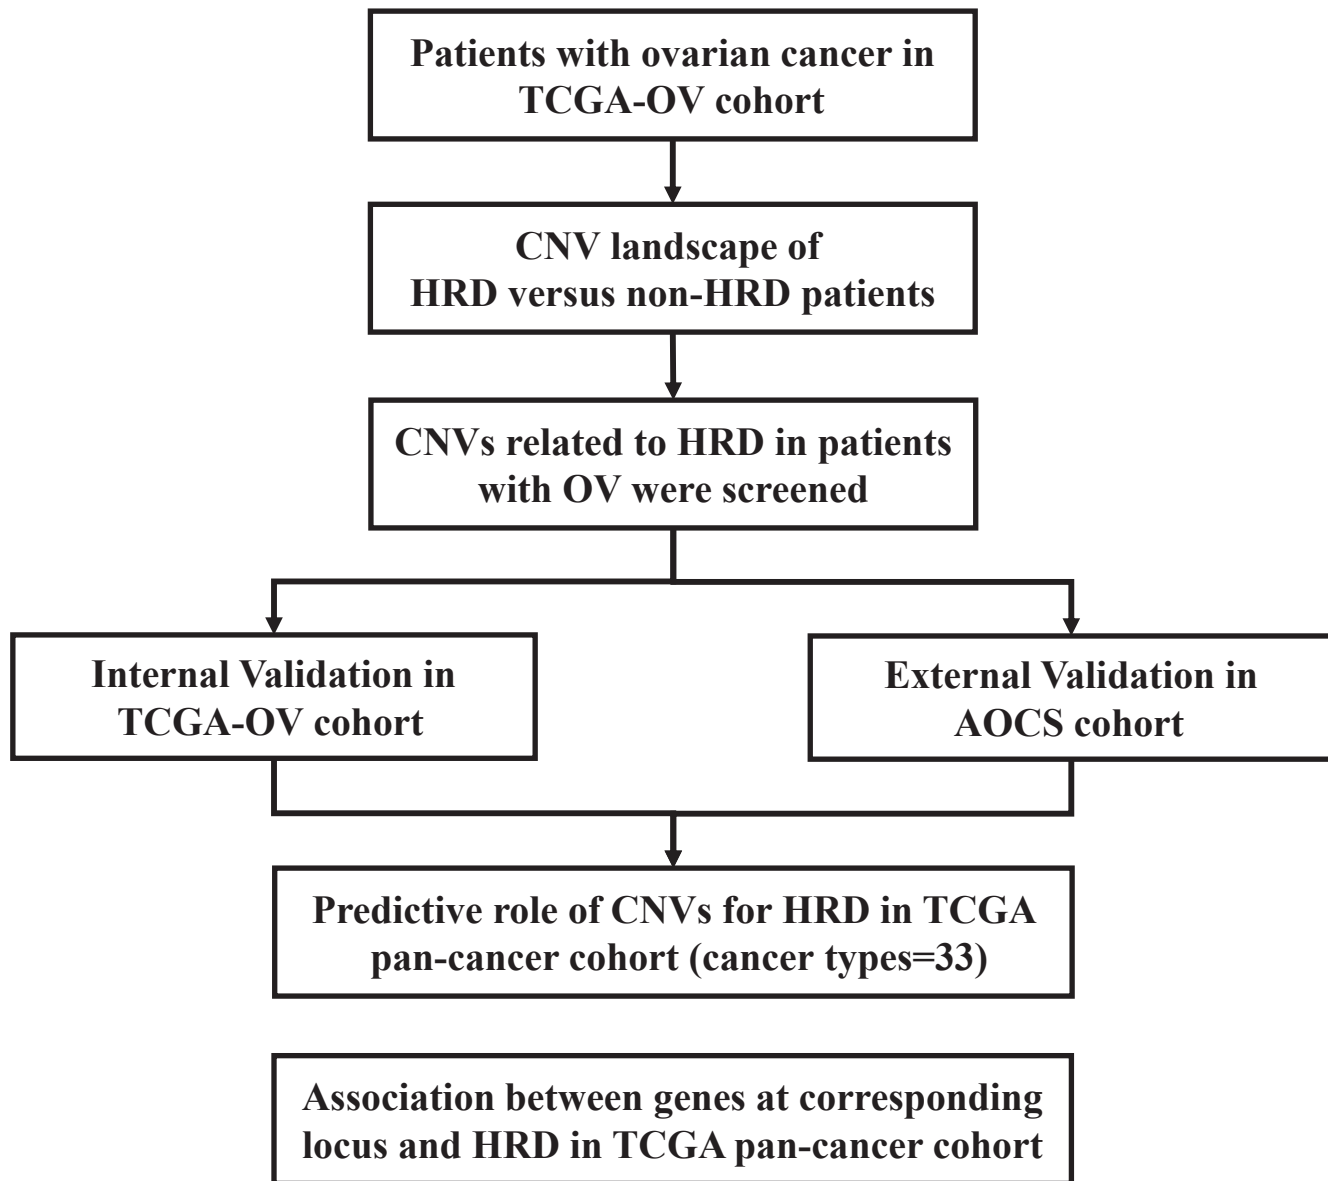

Supplement: Data_Sheet_1.PDF [file Data_Sheet_1.PDF]
