# Supplementary material for: Inferring Homologous Recombination Deficiency of Ovarian Cancer From the Landscape of Copy Number Variation at Subchromosomal and Genetic Resolutions
Source: Front Oncol. 2021 Dec 16;11:772604. doi: 10.3389/fonc.2021.772604 (PMC8716765; doi:10.3389/fonc.2021.772604)
Supplement: Supplementary Table 3 — HRD score of TCGA patients. [file Table_3.xlsx]

## Sheet: HRDscore
ID	TAI	LST	LOH	HRD-score	HRD status
TCGA-02-0001-01	5	8	5	18	non-HRD
TCGA-02-0003-01	2	4	1	7	non-HRD
TCGA-02-0006-01	1	9	3	13	non-HRD
TCGA-02-0007-01	6	4	8	18	non-HRD
TCGA-02-0009-01	3	2	1	6	non-HRD
TCGA-02-0010-01	9	11	9	29	non-HRD
TCGA-02-0011-01	7	3	2	12	non-HRD
TCGA-02-0014-01	11	12	8	31	non-HRD
TCGA-02-0015-01	4	6	6	16	non-HRD
TCGA-02-0016-01	1	1	3	5	non-HRD
TCGA-02-0021-01	1	4	1	6	non-HRD
TCGA-02-0023-01	3	1	2	6	non-HRD
TCGA-02-0024-01	5	15	3	23	non-HRD
TCGA-02-0025-01	10	22	4	36	non-HRD
TCGA-02-0026-01	9	9	8	26	non-HRD
TCGA-02-0027-01	1	3	4	8	non-HRD
TCGA-02-0028-01	4	9	6	19	non-HRD
TCGA-02-0033-01	0	0	0	0	non-HRD
TCGA-02-0034-01	4	3	4	11	non-HRD
TCGA-02-0037-01	3	0	1	4	non-HRD
TCGA-02-0038-01	0	6	2	8	non-HRD
TCGA-02-0039-01	2	0	0	2	non-HRD
TCGA-02-0043-01	2	7	1	10	non-HRD
TCGA-02-0046-01	0	0	0	0	non-HRD
TCGA-02-0047-01	3	2	2	7	non-HRD
TCGA-02-0048-01	2	1	3	6	non-HRD
TCGA-02-0051-01	7	4	1	12	non-HRD
TCGA-02-0052-01	0	1	3	4	non-HRD
TCGA-02-0054-01	4	3	5	12	non-HRD
TCGA-02-0055-01	0	2	1	3	non-HRD
TCGA-02-0057-01	0	1	1	2	non-HRD
TCGA-02-0058-01	5	8	4	17	non-HRD
TCGA-02-0059-01	0	0	0	0	non-HRD
TCGA-02-0060-01	3	2	4	9	non-HRD
TCGA-02-0064-01	4	2	3	9	non-HRD
TCGA-02-0068-01	1	4	2	7	non-HRD
TCGA-02-0069-01	13	8	5	26	non-HRD
TCGA-02-0070-01	0	0	0	0	non-HRD
TCGA-02-0071-01	0	2	1	3	non-HRD
TCGA-02-0074-01	0	0	1	1	non-HRD
TCGA-02-0075-01	0	0	0	0	non-HRD
TCGA-02-0079-01	5	2	6	13	non-HRD
TCGA-02-0080-01	7	3	1	11	non-HRD
TCGA-02-0083-01	3	4	4	11	non-HRD
TCGA-02-0084-01	3	2	3	8	non-HRD
TCGA-02-0085-01	1	1	0	2	non-HRD
TCGA-02-0086-01	1	1	4	6	non-HRD
TCGA-02-0087-01	4	2	1	7	non-HRD
TCGA-02-0089-01	1	4	2	7	non-HRD
TCGA-02-0099-01	4	9	7	20	non-HRD
TCGA-02-0102-01	0	1	1	2	non-HRD
TCGA-02-0104-01	11	11	8	30	non-HRD
TCGA-02-0106-01	10	8	6	24	non-HRD
TCGA-02-0107-01	0	0	0	0	non-HRD
TCGA-02-0111-01	4	5	6	15	non-HRD
TCGA-02-0113-01	0	0	0	0	non-HRD
TCGA-02-0114-01	7	9	6	22	non-HRD
TCGA-02-0115-01	4	7	4	15	non-HRD
TCGA-02-0116-01	1	3	3	7	non-HRD
TCGA-02-0258-01	8	12	9	29	non-HRD
TCGA-02-0260-01	3	0	4	7	non-HRD
TCGA-02-0266-01	5	6	0	11	non-HRD
TCGA-02-0269-01	0	0	0	0	non-HRD
TCGA-02-0271-01	3	3	0	6	non-HRD
TCGA-02-0281-01	3	3	2	8	non-HRD
TCGA-02-0285-01	2	0	2	4	non-HRD
TCGA-02-0290-01	3	0	1	4	non-HRD
TCGA-02-0317-01	2	1	4	7	non-HRD
TCGA-02-0321-01	6	7	6	19	non-HRD
TCGA-02-0324-01	1	0	1	2	non-HRD
TCGA-02-0325-01	2	3	1	6	non-HRD
TCGA-02-0326-01	0	0	0	0	non-HRD
TCGA-02-0330-01	2	2	3	7	non-HRD
TCGA-02-0332-01	2	3	0	5	non-HRD
TCGA-02-0333-01	3	3	4	10	non-HRD
TCGA-02-0337-01	0	1	1	2	non-HRD
TCGA-02-0338-01	1	1	0	2	non-HRD
TCGA-02-0339-01	5	1	4	10	non-HRD
TCGA-02-0422-01	3	3	2	8	non-HRD
TCGA-02-0430-01	3	3	4	10	non-HRD
TCGA-02-0432-01	9	4	5	18	non-HRD
TCGA-02-0440-01	0	1	1	2	non-HRD
TCGA-02-0446-01	1	5	1	7	non-HRD
TCGA-02-0451-01	2	5	2	9	non-HRD
TCGA-02-0456-01	1	1	0	2	non-HRD
TCGA-02-2466-01	8	7	5	20	non-HRD
TCGA-02-2470-01	4	5	3	12	non-HRD
TCGA-02-2483-01	9	6	7	22	non-HRD
TCGA-02-2485-01	1	2	0	3	non-HRD
TCGA-02-2486-01	1	5	3	9	non-HRD
TCGA-04-1331-01	16	21	10	47	HRD
TCGA-04-1332-01	14	16	7	37	non-HRD
TCGA-04-1335-01	19	16	16	51	HRD
TCGA-04-1336-01	21	14	11	46	HRD
TCGA-04-1337-01	10	5	7	22	non-HRD
TCGA-04-1338-01	27	43	16	86	HRD
TCGA-04-1341-01	20	12	9	41	non-HRD
TCGA-04-1342-01	12	14	4	30	non-HRD
TCGA-04-1343-01	15	10	5	30	non-HRD
TCGA-04-1346-01	17	13	4	34	non-HRD
TCGA-04-1347-01	18	23	5	46	HRD
TCGA-04-1348-01	17	12	11	40	non-HRD
TCGA-04-1349-01	14	7	11	32	non-HRD
TCGA-04-1350-01	9	5	1	15	non-HRD
TCGA-04-1351-01	19	15	5	39	non-HRD
TCGA-04-1353-01	23	28	14	65	HRD
TCGA-04-1356-01	29	27	22	78	HRD
TCGA-04-1357-01	23	26	9	58	HRD
TCGA-04-1360-01	24	35	10	69	HRD
TCGA-04-1361-01	20	26	18	64	HRD
TCGA-04-1362-01	31	29	12	72	HRD
TCGA-04-1364-01	19	14	3	36	non-HRD
TCGA-04-1365-01	15	17	15	47	HRD
TCGA-04-1367-01	13	11	9	33	non-HRD
TCGA-04-1371-01	15	19	7	41	non-HRD
TCGA-04-1514-01	19	12	11	42	HRD
TCGA-04-1516-01	26	31	17	74	HRD
TCGA-04-1517-01	19	14	12	45	HRD
TCGA-04-1519-01	3	2	3	8	non-HRD
TCGA-04-1525-01	14	11	3	28	non-HRD
TCGA-04-1530-01	24	27	11	62	HRD
TCGA-04-1536-01	26	26	10	62	HRD
TCGA-04-1542-01	15	14	8	37	non-HRD
TCGA-04-1638-01	12	6	5	23	non-HRD
TCGA-04-1644-01	14	8	8	30	non-HRD
TCGA-04-1646-01	11	7	9	27	non-HRD
TCGA-04-1648-01	7	2	5	14	non-HRD
TCGA-04-1649-01	15	7	1	23	non-HRD
TCGA-04-1651-01	22	30	19	71	HRD
TCGA-04-1652-01	13	10	3	26	non-HRD
TCGA-04-1654-01	20	28	22	70	HRD
TCGA-04-1655-01	14	10	2	26	non-HRD
TCGA-05-4244-01	14	8	6	28	non-HRD
TCGA-05-4249-01	4	3	3	10	non-HRD
TCGA-05-4250-01	4	6	4	14	non-HRD
TCGA-05-4382-01	16	10	7	33	non-HRD
TCGA-05-4384-01	4	2	2	8	non-HRD
TCGA-05-4389-01	17	16	12	45	HRD
TCGA-05-4390-01	15	10	2	27	non-HRD
TCGA-05-4395-01	17	7	12	36	non-HRD
TCGA-05-4396-01	5	2	6	13	non-HRD
TCGA-05-4397-01	17	15	11	43	HRD
TCGA-05-4398-01	18	16	13	47	HRD
TCGA-05-4402-01	10	4	7	21	non-HRD
TCGA-05-4403-01	3	3	4	10	non-HRD
TCGA-05-4405-01	11	3	7	21	non-HRD
TCGA-05-4410-01	18	7	7	32	non-HRD
TCGA-05-4415-01	13	4	7	24	non-HRD
TCGA-05-4417-01	8	10	4	22	non-HRD
TCGA-05-4418-01	2	2	1	5	non-HRD
TCGA-05-4420-01	19	18	9	46	HRD
TCGA-05-4422-01	8	6	6	20	non-HRD
TCGA-05-4424-01	14	11	4	29	non-HRD
TCGA-05-4425-01	4	2	4	10	non-HRD
TCGA-05-4426-01	5	4	5	14	non-HRD
TCGA-05-4427-01	18	11	5	34	non-HRD
TCGA-05-4430-01	11	4	5	20	non-HRD
TCGA-05-4432-01	15	10	4	29	non-HRD
TCGA-05-4433-01	7	2	8	17	non-HRD
TCGA-05-4434-01	5	9	5	19	non-HRD
TCGA-05-5420-01	5	4	6	15	non-HRD
TCGA-05-5423-01	7	4	1	12	non-HRD
TCGA-05-5425-01	14	2	5	21	non-HRD
TCGA-05-5428-01	18	13	10	41	non-HRD
TCGA-05-5429-01	6	2	6	14	non-HRD
TCGA-05-5715-01	3	5	3	11	non-HRD
TCGA-06-0119-01	0	1	0	1	non-HRD
TCGA-06-0122-01	4	9	4	17	non-HRD
TCGA-06-0124-01	3	4	2	9	non-HRD
TCGA-06-0125-01	1	3	3	7	non-HRD
TCGA-06-0125-02	3	3	3	9	non-HRD
TCGA-06-0126-01	2	4	2	8	non-HRD
TCGA-06-0127-01	2	4	2	8	non-HRD
TCGA-06-0128-01	3	1	1	5	non-HRD
TCGA-06-0129-01	5	5	1	11	non-HRD
TCGA-06-0130-01	3	3	3	9	non-HRD
TCGA-06-0132-01	0	1	2	3	non-HRD
TCGA-06-0133-01	1	1	2	4	non-HRD
TCGA-06-0137-01	1	1	0	2	non-HRD
TCGA-06-0140-01	0	1	1	2	non-HRD
TCGA-06-0141-01	1	1	0	2	non-HRD
TCGA-06-0143-01	1	4	2	7	non-HRD
TCGA-06-0145-01	3	1	2	6	non-HRD
TCGA-06-0148-01	5	4	2	11	non-HRD
TCGA-06-0149-01	1	3	0	4	non-HRD
TCGA-06-0151-01	3	3	2	8	non-HRD
TCGA-06-0152-01	2	4	1	7	non-HRD
TCGA-06-0152-02	3	0	1	4	non-HRD
TCGA-06-0154-01	4	1	6	11	non-HRD
TCGA-06-0155-01	0	2	0	2	non-HRD
TCGA-06-0157-01	1	2	0	3	non-HRD
TCGA-06-0158-01	2	4	2	8	non-HRD
TCGA-06-0159-01	0	0	0	0	non-HRD
TCGA-06-0162-01	4	6	1	11	non-HRD
TCGA-06-0164-01	2	3	4	9	non-HRD
TCGA-06-0166-01	4	5	3	12	non-HRD
TCGA-06-0168-01	2	2	7	11	non-HRD
TCGA-06-0169-01	2	1	0	3	non-HRD
TCGA-06-0171-01	5	6	7	18	non-HRD
TCGA-06-0171-02	1	3	1	5	non-HRD
TCGA-06-0173-01	0	2	1	3	non-HRD
TCGA-06-0174-01	0	2	0	2	non-HRD
TCGA-06-0175-01	6	7	5	18	non-HRD
TCGA-06-0177-01	1	3	1	5	non-HRD
TCGA-06-0179-01	0	0	0	0	non-HRD
TCGA-06-0182-01	4	8	3	15	non-HRD
TCGA-06-0184-01	3	3	1	7	non-HRD
TCGA-06-0185-01	3	0	3	6	non-HRD
TCGA-06-0187-01	6	2	3	11	non-HRD
TCGA-06-0188-01	4	3	4	11	non-HRD
TCGA-06-0190-01	2	8	4	14	non-HRD
TCGA-06-0190-02	3	4	4	11	non-HRD
TCGA-06-0192-01	0	0	1	1	non-HRD
TCGA-06-0194-01	0	0	0	0	non-HRD
TCGA-06-0195-01	3	1	2	6	non-HRD
TCGA-06-0197-01	0	0	2	2	non-HRD
TCGA-06-0201-01	0	5	2	7	non-HRD
TCGA-06-0206-01	2	1	3	6	non-HRD
TCGA-06-0208-01	2	2	2	6	non-HRD
TCGA-06-0209-01	3	1	0	4	non-HRD
TCGA-06-0210-01	3	0	0	3	non-HRD
TCGA-06-0210-02	3	0	0	3	non-HRD
TCGA-06-0211-01	2	0	0	2	non-HRD
TCGA-06-0211-02	2	0	1	3	non-HRD
TCGA-06-0213-01	5	6	3	14	non-HRD
TCGA-06-0214-01	5	3	9	17	non-HRD
TCGA-06-0216-01	3	2	3	8	non-HRD
TCGA-06-0219-01	2	8	5	15	non-HRD
TCGA-06-0221-01	7	8	3	18	non-HRD
TCGA-06-0221-02	10	9	5	24	non-HRD
TCGA-06-0237-01	0	2	3	5	non-HRD
TCGA-06-0238-01	1	3	1	5	non-HRD
TCGA-06-0241-01	4	5	1	10	non-HRD
TCGA-06-0394-01	2	1	1	4	non-HRD
TCGA-06-0397-01	2	3	2	7	non-HRD
TCGA-06-0402-01	5	6	7	18	non-HRD
TCGA-06-0409-01	8	6	0	14	non-HRD
TCGA-06-0410-01	6	2	5	13	non-HRD
TCGA-06-0412-01	2	1	2	5	non-HRD
TCGA-06-0413-01	1	3	2	6	non-HRD
TCGA-06-0414-01	0	0	0	0	non-HRD
TCGA-06-0644-01	1	2	1	4	non-HRD
TCGA-06-0645-01	1	3	3	7	non-HRD
TCGA-06-0646-01	0	1	1	2	non-HRD
TCGA-06-0648-01	2	1	1	4	non-HRD
TCGA-06-0649-01	1	4	3	8	non-HRD
TCGA-06-0650-01	0	0	0	0	non-HRD
TCGA-06-0686-01	0	4	0	4	non-HRD
TCGA-06-0743-01	1	3	0	4	non-HRD
TCGA-06-0744-01	5	3	3	11	non-HRD
TCGA-06-0745-01	5	10	6	21	non-HRD
TCGA-06-0747-01	3	4	5	12	non-HRD
TCGA-06-0749-01	2	3	4	9	non-HRD
TCGA-06-0750-01	2	1	4	7	non-HRD
TCGA-06-0875-01	2	2	2	6	non-HRD
TCGA-06-0876-01	3	3	2	8	non-HRD
TCGA-06-0877-01	0	0	0	0	non-HRD
TCGA-06-0878-01	3	2	3	8	non-HRD
TCGA-06-0879-01	4	1	1	6	non-HRD
TCGA-06-0882-01	2	3	2	7	non-HRD
TCGA-06-0939-01	0	1	1	2	non-HRD
TCGA-06-1084-01	5	5	5	15	non-HRD
TCGA-06-1086-01	2	0	1	3	non-HRD
TCGA-06-1087-01	7	8	7	22	non-HRD
TCGA-06-1800-01	1	2	4	7	non-HRD
TCGA-06-1801-01	1	5	4	10	non-HRD
TCGA-06-1802-01	2	3	5	10	non-HRD
TCGA-06-1804-01	0	3	1	4	non-HRD
TCGA-06-1805-01	2	1	3	6	non-HRD
TCGA-06-1806-01	0	1	1	2	non-HRD
TCGA-06-2557-01	3	4	2	9	non-HRD
TCGA-06-2558-01	4	6	5	15	non-HRD
TCGA-06-2559-01	2	2	2	6	non-HRD
TCGA-06-2561-01	3	1	2	6	non-HRD
TCGA-06-2562-01	3	4	3	10	non-HRD
TCGA-06-2563-01	4	6	3	13	non-HRD
TCGA-06-2564-01	0	0	0	0	non-HRD
TCGA-06-2565-01	3	4	4	11	non-HRD
TCGA-06-2566-01	1	2	1	4	non-HRD
TCGA-06-2567-01	1	2	2	5	non-HRD
TCGA-06-2569-01	17	7	7	31	non-HRD
TCGA-06-2570-01	3	3	3	9	non-HRD
TCGA-06-5408-01	4	3	3	10	non-HRD
TCGA-06-5411-01	0	1	2	3	non-HRD
TCGA-06-5412-01	0	0	0	0	non-HRD
TCGA-06-5413-01	3	3	2	8	non-HRD
TCGA-06-5414-01	1	1	1	3	non-HRD
TCGA-06-5415-01	3	6	4	13	non-HRD
TCGA-06-5416-01	3	4	1	8	non-HRD
TCGA-06-5418-01	2	3	3	8	non-HRD
TCGA-06-5856-01	2	2	8	12	non-HRD
TCGA-06-5858-01	1	0	0	1	non-HRD
TCGA-06-5859-01	15	11	11	37	non-HRD
TCGA-06-6388-01	2	2	3	7	non-HRD
TCGA-06-6389-01	5	9	6	20	non-HRD
TCGA-06-6390-01	2	3	0	5	non-HRD
TCGA-06-6391-01	8	9	2	19	non-HRD
TCGA-06-6693-01	6	3	7	16	non-HRD
TCGA-06-6694-01	9	6	6	21	non-HRD
TCGA-06-6695-01	4	5	3	12	non-HRD
TCGA-06-6697-01	5	3	1	9	non-HRD
TCGA-06-6698-01	1	1	0	2	non-HRD
TCGA-06-6699-01	3	1	4	8	non-HRD
TCGA-06-6700-01	3	2	2	7	non-HRD
TCGA-06-6701-01	1	4	2	7	non-HRD
TCGA-06-A5U0-01	9	3	6	18	non-HRD
TCGA-06-A5U1-01	5	5	7	17	non-HRD
TCGA-06-A6S0-01	3	1	4	8	non-HRD
TCGA-06-A6S1-01	1	3	2	6	non-HRD
TCGA-06-A7TK-01	1	2	1	4	non-HRD
TCGA-06-A7TL-01	9	3	6	18	non-HRD
TCGA-08-0244-01	2	2	2	6	non-HRD
TCGA-08-0245-01	11	7	14	32	non-HRD
TCGA-08-0246-01	1	1	3	5	non-HRD
TCGA-08-0344-01	3	2	3	8	non-HRD
TCGA-08-0345-01	1	0	0	1	non-HRD
TCGA-08-0346-01	0	0	0	0	non-HRD
TCGA-08-0347-01	1	1	2	4	non-HRD
TCGA-08-0348-01	0	5	2	7	non-HRD
TCGA-08-0349-01	1	1	5	7	non-HRD
TCGA-08-0350-01	5	8	3	16	non-HRD
TCGA-08-0351-01	9	8	3	20	non-HRD
TCGA-08-0352-01	1	1	0	2	non-HRD
TCGA-08-0353-01	4	6	6	16	non-HRD
TCGA-08-0354-01	3	1	1	5	non-HRD
TCGA-08-0355-01	2	1	1	4	non-HRD
TCGA-08-0356-01	2	2	1	5	non-HRD
TCGA-08-0357-01	1	2	1	4	non-HRD
TCGA-08-0358-01	5	4	4	13	non-HRD
TCGA-08-0359-01	3	1	3	7	non-HRD
TCGA-08-0375-01	2	0	3	5	non-HRD
TCGA-08-0380-01	0	1	1	2	non-HRD
TCGA-08-0386-01	4	7	5	16	non-HRD
TCGA-08-0389-01	1	0	1	2	non-HRD
TCGA-08-0390-01	3	4	3	10	non-HRD
TCGA-08-0392-01	4	3	5	12	non-HRD
TCGA-08-0509-01	0	2	1	3	non-HRD
TCGA-08-0510-01	3	5	2	10	non-HRD
TCGA-08-0512-01	3	2	3	8	non-HRD
TCGA-08-0514-01	5	1	5	11	non-HRD
TCGA-08-0516-01	4	4	3	11	non-HRD
TCGA-08-0517-01	14	13	8	35	non-HRD
TCGA-08-0518-01	3	9	3	15	non-HRD
TCGA-08-0520-01	7	4	5	16	non-HRD
TCGA-08-0521-01	1	1	1	3	non-HRD
TCGA-08-0524-01	4	4	8	16	non-HRD
TCGA-08-0525-01	4	6	8	18	non-HRD
TCGA-08-0529-01	1	1	1	3	non-HRD
TCGA-08-0531-01	1	2	1	4	non-HRD
TCGA-09-0364-01	16	23	11	50	HRD
TCGA-09-0365-01	10	3	0	13	non-HRD
TCGA-09-0366-01	13	4	4	21	non-HRD
TCGA-09-0367-01	28	40	10	78	HRD
TCGA-09-0369-01	21	17	7	45	HRD
TCGA-09-1659-01	16	9	10	35	non-HRD
TCGA-09-1661-01	18	5	3	26	non-HRD
TCGA-09-1662-01	19	26	13	58	HRD
TCGA-09-1664-01	4	3	5	12	non-HRD
TCGA-09-1665-01	31	30	23	84	HRD
TCGA-09-1666-01	26	23	15	64	HRD
TCGA-09-1667-01	21	18	7	46	HRD
TCGA-09-1668-01	20	25	11	56	HRD
TCGA-09-1669-01	19	18	13	50	HRD
TCGA-09-1672-01	1	0	1	2	non-HRD
TCGA-09-1673-01	21	4	7	32	non-HRD
TCGA-09-1674-01	21	14	6	41	non-HRD
TCGA-09-1675-01	19	29	20	68	HRD
TCGA-09-2043-01	25	28	19	72	HRD
TCGA-09-2044-01	28	28	22	78	HRD
TCGA-09-2045-01	18	23	8	49	HRD
TCGA-09-2048-01	27	44	28	99	HRD
TCGA-09-2049-01	28	31	7	66	HRD
TCGA-09-2050-01	19	22	17	58	HRD
TCGA-09-2051-01	24	30	17	71	HRD
TCGA-09-2053-01	16	8	7	31	non-HRD
TCGA-09-2054-01	17	19	10	46	HRD
TCGA-09-2055-01	24	20	9	53	HRD
TCGA-09-2056-01	18	19	15	52	HRD
TCGA-10-0925-01	17	16	12	45	HRD
TCGA-10-0926-01	7	3	2	12	non-HRD
TCGA-10-0927-01	8	6	5	19	non-HRD
TCGA-10-0928-01	35	41	22	98	HRD
TCGA-10-0930-01	30	38	16	84	HRD
TCGA-10-0931-01	25	21	16	62	HRD
TCGA-10-0933-01	15	7	6	28	non-HRD
TCGA-10-0934-01	3	9	5	17	non-HRD
TCGA-10-0935-01	11	17	2	30	non-HRD
TCGA-10-0936-01	13	12	3	28	non-HRD
TCGA-10-0937-01	25	29	14	68	HRD
TCGA-10-0938-01	16	9	5	30	non-HRD
TCGA-12-0615-01	7	10	6	23	non-HRD
TCGA-12-0616-01	5	3	4	12	non-HRD
TCGA-12-0618-01	2	2	3	7	non-HRD
TCGA-12-0619-01	0	3	2	5	non-HRD
TCGA-12-0620-01	2	6	3	11	non-HRD
TCGA-12-0654-01	3	0	4	7	non-HRD
TCGA-12-0656-01	4	2	5	11	non-HRD
TCGA-12-0657-01	5	1	2	8	non-HRD
TCGA-12-0662-01	3	1	3	7	non-HRD
TCGA-12-0670-01	2	5	4	11	non-HRD
TCGA-12-0688-01	1	2	0	3	non-HRD
TCGA-12-0691-01	10	12	7	29	non-HRD
TCGA-12-0692-01	2	4	2	8	non-HRD
TCGA-12-0703-01	1	1	1	3	non-HRD
TCGA-12-0707-01	2	2	2	6	non-HRD
TCGA-12-0769-01	1	3	1	5	non-HRD
TCGA-12-0772-01	3	2	2	7	non-HRD
TCGA-12-0773-01	3	6	2	11	non-HRD
TCGA-12-0775-01	1	3	2	6	non-HRD
TCGA-12-0776-01	5	7	8	20	non-HRD
TCGA-12-0778-01	2	4	6	12	non-HRD
TCGA-12-0780-01	3	1	2	6	non-HRD
TCGA-12-0818-01	5	5	1	11	non-HRD
TCGA-12-0819-01	2	2	4	8	non-HRD
TCGA-12-0820-01	6	3	5	14	non-HRD
TCGA-12-0821-01	2	3	2	7	non-HRD
TCGA-12-0822-01	1	1	0	2	non-HRD
TCGA-12-0826-01	5	1	0	6	non-HRD
TCGA-12-0827-01	8	10	8	26	non-HRD
TCGA-12-0828-01	0	0	0	0	non-HRD
TCGA-12-0829-01	1	2	1	4	non-HRD
TCGA-12-1088-01	5	7	6	18	non-HRD
TCGA-12-1089-01	2	8	4	14	non-HRD
TCGA-12-1090-01	2	2	1	5	non-HRD
TCGA-12-1091-01	3	3	2	8	non-HRD
TCGA-12-1092-01	3	2	3	8	non-HRD
TCGA-12-1093-01	5	6	5	16	non-HRD
TCGA-12-1094-01	0	2	0	2	non-HRD
TCGA-12-1095-01	6	3	5	14	non-HRD
TCGA-12-1096-01	1	0	1	2	non-HRD
TCGA-12-1097-01	2	1	4	7	non-HRD
TCGA-12-1098-01	9	6	8	23	non-HRD
TCGA-12-1099-01	4	3	0	7	non-HRD
TCGA-12-1598-01	3	3	7	13	non-HRD
TCGA-12-1599-01	0	2	1	3	non-HRD
TCGA-12-1600-01	1	2	1	4	non-HRD
TCGA-12-1602-01	8	5	3	16	non-HRD
TCGA-12-3644-01	0	1	1	2	non-HRD
TCGA-12-3646-01	1	0	0	1	non-HRD
TCGA-12-3648-01	0	2	0	2	non-HRD
TCGA-12-3649-01	3	6	2	11	non-HRD
TCGA-12-3650-01	0	0	0	0	non-HRD
TCGA-12-3651-01	8	6	4	18	non-HRD
TCGA-12-3652-01	2	3	2	7	non-HRD
TCGA-12-3653-01	1	6	5	12	non-HRD
TCGA-12-5295-01	8	4	2	14	non-HRD
TCGA-12-5299-01	2	0	3	5	non-HRD
TCGA-12-5301-01	6	3	4	13	non-HRD
TCGA-13-0714-01	28	35	20	83	HRD
TCGA-13-0720-01	17	23	12	52	HRD
TCGA-13-0723-01	16	11	13	40	non-HRD
TCGA-13-0724-01	15	10	7	32	non-HRD
TCGA-13-0725-01	22	20	18	60	HRD
TCGA-13-0726-01	15	22	9	46	HRD
TCGA-13-0727-01	9	4	2	15	non-HRD
TCGA-13-0730-01	23	16	5	44	HRD
TCGA-13-0751-01	15	22	4	41	non-HRD
TCGA-13-0755-01	19	25	10	54	HRD
TCGA-13-0757-01	17	17	5	39	non-HRD
TCGA-13-0758-01	26	31	16	73	HRD
TCGA-13-0760-01	26	35	18	79	HRD
TCGA-13-0761-01	21	27	13	61	HRD
TCGA-13-0762-01	14	18	8	40	non-HRD
TCGA-13-0764-01	28	18	11	57	HRD
TCGA-13-0766-01	28	27	18	73	HRD
TCGA-13-0768-01	19	6	12	37	non-HRD
TCGA-13-0791-01	16	16	11	43	HRD
TCGA-13-0792-01	29	38	12	79	HRD
TCGA-13-0793-01	16	15	11	42	HRD
TCGA-13-0794-01	16	19	5	40	non-HRD
TCGA-13-0795-01	19	15	4	38	non-HRD
TCGA-13-0797-01	21	19	10	50	HRD
TCGA-13-0799-01	21	20	15	56	HRD
TCGA-13-0800-01	9	6	3	18	non-HRD
TCGA-13-0801-01	21	31	21	73	HRD
TCGA-13-0802-01	19	17	7	43	HRD
TCGA-13-0803-01	17	21	8	46	HRD
TCGA-13-0804-01	8	9	10	27	non-HRD
TCGA-13-0805-01	14	15	13	42	HRD
TCGA-13-0807-01	14	8	7	29	non-HRD
TCGA-13-0883-01	18	25	6	49	HRD
TCGA-13-0884-01	22	19	4	45	HRD
TCGA-13-0885-01	28	33	7	68	HRD
TCGA-13-0886-01	15	25	13	53	HRD
TCGA-13-0887-01	21	36	19	76	HRD
TCGA-13-0888-01	18	10	0	28	non-HRD
TCGA-13-0889-01	15	14	9	38	non-HRD
TCGA-13-0890-01	20	20	17	57	HRD
TCGA-13-0891-01	16	8	5	29	non-HRD
TCGA-13-0893-01	26	36	15	77	HRD
TCGA-13-0897-01	21	27	11	59	HRD
TCGA-13-0899-01	14	7	6	27	non-HRD
TCGA-13-0900-01	23	29	17	69	HRD
TCGA-13-0901-01	19	12	3	34	non-HRD
TCGA-13-0903-01	22	22	17	61	HRD
TCGA-13-0904-01	28	45	13	86	HRD
TCGA-13-0905-01	23	47	22	92	HRD
TCGA-13-0906-01	24	23	14	61	HRD
TCGA-13-0908-01	20	29	13	62	HRD
TCGA-13-0910-01	10	11	3	24	non-HRD
TCGA-13-0911-01	14	10	5	29	non-HRD
TCGA-13-0912-01	12	6	4	22	non-HRD
TCGA-13-0913-01	21	28	22	71	HRD
TCGA-13-0916-01	26	19	21	66	HRD
TCGA-13-0919-01	19	20	9	48	HRD
TCGA-13-0921-01	12	12	8	32	non-HRD
TCGA-13-0923-01	24	33	10	67	HRD
TCGA-13-0924-01	19	22	17	58	HRD
TCGA-13-1403-01	18	18	15	51	HRD
TCGA-13-1404-01	23	25	16	64	HRD
TCGA-13-1405-01	7	5	3	15	non-HRD
TCGA-13-1407-01	18	8	6	32	non-HRD
TCGA-13-1408-01	28	32	7	67	HRD
TCGA-13-1409-01	10	7	3	20	non-HRD
TCGA-13-1410-01	20	14	6	40	non-HRD
TCGA-13-1411-01	13	10	6	29	non-HRD
TCGA-13-1412-01	22	30	10	62	HRD
TCGA-13-1477-01	4	4	2	10	non-HRD
TCGA-13-1481-01	18	27	17	62	HRD
TCGA-13-1482-01	22	19	10	51	HRD
TCGA-13-1483-01	20	20	14	54	HRD
TCGA-13-1484-01	10	7	5	22	non-HRD
TCGA-13-1485-01	2	0	2	4	non-HRD
TCGA-13-1487-01	14	10	5	29	non-HRD
TCGA-13-1488-01	19	28	7	54	HRD
TCGA-13-1489-01	31	26	20	77	HRD
TCGA-13-1491-01	12	12	7	31	non-HRD
TCGA-13-1492-01	11	4	8	23	non-HRD
TCGA-13-1494-01	25	27	29	81	HRD
TCGA-13-1495-01	20	8	6	34	non-HRD
TCGA-13-1496-01	20	8	8	36	non-HRD
TCGA-13-1497-01	29	38	15	82	HRD
TCGA-13-1498-01	23	29	17	69	HRD
TCGA-13-1499-01	16	27	10	53	HRD
TCGA-13-1500-01	11	8	6	25	non-HRD
TCGA-13-1501-01	24	27	15	66	HRD
TCGA-13-1504-01	21	16	4	41	non-HRD
TCGA-13-1505-01	15	19	10	44	HRD
TCGA-13-1506-01	16	15	3	34	non-HRD
TCGA-13-1507-01	12	12	8	32	non-HRD
TCGA-13-1509-01	19	26	20	65	HRD
TCGA-13-1510-01	25	32	16	73	HRD
TCGA-13-1511-01	16	12	8	36	non-HRD
TCGA-13-1512-01	29	26	17	72	HRD
TCGA-13-1817-01	8	3	6	17	non-HRD
TCGA-13-1819-01	28	34	24	86	HRD
TCGA-13-2057-01	27	22	10	59	HRD
TCGA-13-2059-01	31	34	20	85	HRD
TCGA-13-2060-01	29	12	11	52	HRD
TCGA-13-2061-01	30	36	13	79	HRD
TCGA-13-2065-01	21	27	17	65	HRD
TCGA-13-2071-01	25	35	19	79	HRD
TCGA-13-A5FT-01	21	17	7	45	HRD
TCGA-13-A5FU-01	18	16	8	42	HRD
TCGA-14-0736-01	4	6	4	14	non-HRD
TCGA-14-0736-02	2	4	2	8	non-HRD
TCGA-14-0740-01	7	2	6	15	non-HRD
TCGA-14-0781-01	0	1	0	1	non-HRD
TCGA-14-0783-01	4	0	2	6	non-HRD
TCGA-14-0786-01	4	1	2	7	non-HRD
TCGA-14-0787-01	5	4	4	13	non-HRD
TCGA-14-0789-01	0	0	0	0	non-HRD
TCGA-14-0790-01	0	6	3	9	non-HRD
TCGA-14-0812-01	3	0	1	4	non-HRD
TCGA-14-0813-01	3	3	1	7	non-HRD
TCGA-14-0817-01	1	6	3	10	non-HRD
TCGA-14-0862-01	9	6	10	25	non-HRD
TCGA-14-0865-01	4	4	2	10	non-HRD
TCGA-14-0866-01	0	1	0	1	non-HRD
TCGA-14-0867-01	0	1	1	2	non-HRD
TCGA-14-0871-01	18	9	4	31	non-HRD
TCGA-14-1034-01	4	2	2	8	non-HRD
TCGA-14-1034-02	9	8	7	24	non-HRD
TCGA-14-1037-01	3	2	4	9	non-HRD
TCGA-14-1043-01	2	0	0	2	non-HRD
TCGA-14-1395-01	1	0	2	3	non-HRD
TCGA-14-1396-01	6	5	6	17	non-HRD
TCGA-14-1401-01	1	2	2	5	non-HRD
TCGA-14-1402-01	3	2	5	10	non-HRD
TCGA-14-1450-01	0	0	0	0	non-HRD
TCGA-14-1451-01	3	2	4	9	non-HRD
TCGA-14-1452-01	3	2	2	7	non-HRD
TCGA-14-1453-01	14	8	8	30	non-HRD
TCGA-14-1454-01	1	1	0	2	non-HRD
TCGA-14-1455-01	0	0	0	0	non-HRD
TCGA-14-1456-01	4	2	1	7	non-HRD
TCGA-14-1458-01	0	0	1	1	non-HRD
TCGA-14-1459-01	1	3	6	10	non-HRD
TCGA-14-1794-01	1	0	1	2	non-HRD
TCGA-14-1795-01	1	1	1	3	non-HRD
TCGA-14-1821-01	9	6	4	19	non-HRD
TCGA-14-1823-01	1	1	0	2	non-HRD
TCGA-14-1825-01	2	4	1	7	non-HRD
TCGA-14-1827-01	1	0	2	3	non-HRD
TCGA-14-1829-01	2	1	0	3	non-HRD
TCGA-14-2554-01	2	4	2	8	non-HRD
TCGA-14-2555-01	0	0	0	0	non-HRD
TCGA-14-3477-01	15	9	1	25	non-HRD
TCGA-14-4157-01	8	7	8	23	non-HRD
TCGA-15-0742-01	4	4	3	11	non-HRD
TCGA-15-1444-01	2	3	3	8	non-HRD
TCGA-15-1446-01	3	1	0	4	non-HRD
TCGA-15-1447-01	9	5	5	19	non-HRD
TCGA-15-1449-01	2	2	1	5	non-HRD
TCGA-16-0846-01	5	2	2	9	non-HRD
TCGA-16-0848-01	0	1	0	1	non-HRD
TCGA-16-0849-01	4	4	2	10	non-HRD
TCGA-16-0850-01	10	5	3	18	non-HRD
TCGA-16-0861-01	8	3	4	15	non-HRD
TCGA-16-1045-01	2	1	3	6	non-HRD
TCGA-16-1047-01	1	2	2	5	non-HRD
TCGA-16-1048-01	5	3	3	11	non-HRD
TCGA-16-1055-01	2	8	6	16	non-HRD
TCGA-16-1056-01	5	5	3	13	non-HRD
TCGA-16-1060-01	5	4	7	16	non-HRD
TCGA-16-1062-01	2	1	0	3	non-HRD
TCGA-16-1063-01	4	2	6	12	non-HRD
TCGA-16-1460-01	5	1	1	7	non-HRD
TCGA-18-3406-01	14	12	14	40	non-HRD
TCGA-18-3407-01	9	4	5	18	non-HRD
TCGA-18-3408-01	4	3	4	11	non-HRD
TCGA-18-3409-01	3	3	1	7	non-HRD
TCGA-18-3410-01	6	6	8	20	non-HRD
TCGA-18-3411-01	23	16	11	50	HRD
TCGA-18-3412-01	16	17	9	42	HRD
TCGA-18-3414-01	13	6	7	26	non-HRD
TCGA-18-3415-01	18	20	10	48	HRD
TCGA-18-3416-01	22	19	18	59	HRD
TCGA-18-3417-01	20	9	12	41	non-HRD
TCGA-18-3419-01	11	8	11	30	non-HRD
TCGA-18-3421-01	24	32	10	66	HRD
TCGA-18-4083-01	21	21	8	50	HRD
TCGA-18-4086-01	13	10	9	32	non-HRD
TCGA-18-4721-01	19	12	20	51	HRD
TCGA-18-5592-01	11	9	8	28	non-HRD
TCGA-18-5595-01	4	4	4	12	non-HRD
TCGA-19-0955-01	3	3	3	9	non-HRD
TCGA-19-0957-01	0	3	1	4	non-HRD
TCGA-19-0960-01	7	8	7	22	non-HRD
TCGA-19-0962-01	1	7	2	10	non-HRD
TCGA-19-0963-01	3	2	2	7	non-HRD
TCGA-19-0964-01	1	2	2	5	non-HRD
TCGA-19-1385-01	0	0	0	0	non-HRD
TCGA-19-1386-01	2	1	0	3	non-HRD
TCGA-19-1387-01	0	0	2	2	non-HRD
TCGA-19-1388-01	15	15	9	39	non-HRD
TCGA-19-1389-01	2	3	2	7	non-HRD
TCGA-19-1390-01	5	5	3	13	non-HRD
TCGA-19-1392-01	6	5	2	13	non-HRD
TCGA-19-1786-01	5	6	3	14	non-HRD
TCGA-19-1787-01	6	3	2	11	non-HRD
TCGA-19-1789-01	3	3	0	6	non-HRD
TCGA-19-1791-01	2	2	1	5	non-HRD
TCGA-19-2619-01	6	9	7	22	non-HRD
TCGA-19-2620-01	6	2	0	8	non-HRD
TCGA-19-2621-01	0	1	1	2	non-HRD
TCGA-19-2623-01	0	2	2	4	non-HRD
TCGA-19-2624-01	0	2	0	2	non-HRD
TCGA-19-2625-01	4	6	2	12	non-HRD
TCGA-19-2629-01	9	7	4	20	non-HRD
TCGA-19-2631-01	2	1	1	4	non-HRD
TCGA-19-4065-01	1	5	3	9	non-HRD
TCGA-19-4065-02	2	3	3	8	non-HRD
TCGA-19-5947-01	2	0	2	4	non-HRD
TCGA-19-5950-01	2	1	0	3	non-HRD
TCGA-19-5951-01	3	4	2	9	non-HRD
TCGA-19-5952-01	2	1	3	6	non-HRD
TCGA-19-5953-01	0	5	1	6	non-HRD
TCGA-19-5954-01	1	5	1	7	non-HRD
TCGA-19-5955-01	1	2	1	4	non-HRD
TCGA-19-5956-01	5	6	0	11	non-HRD
TCGA-19-5958-01	6	3	4	13	non-HRD
TCGA-19-5959-01	3	2	0	5	non-HRD
TCGA-19-5960-01	2	4	5	11	non-HRD
TCGA-19-A60I-01	2	1	5	8	non-HRD
TCGA-19-A6J4-01	1	1	4	6	non-HRD
TCGA-19-A6J5-01	9	7	7	23	non-HRD
TCGA-20-0987-01	19	8	9	36	non-HRD
TCGA-20-0990-01	19	10	5	34	non-HRD
TCGA-20-0991-01	16	10	2	28	non-HRD
TCGA-20-1682-01	23	19	16	58	HRD
TCGA-20-1683-01	17	8	8	33	non-HRD
TCGA-20-1684-01	19	7	3	29	non-HRD
TCGA-20-1685-01	24	26	8	58	HRD
TCGA-20-1686-01	15	13	7	35	non-HRD
TCGA-20-1687-01	29	29	13	71	HRD
TCGA-21-1070-01	13	14	14	41	non-HRD
TCGA-21-1071-01	9	5	8	22	non-HRD
TCGA-21-1072-01	17	12	14	43	HRD
TCGA-21-1075-01	15	4	11	30	non-HRD
TCGA-21-1076-01	10	6	6	22	non-HRD
TCGA-21-1077-01	12	12	6	30	non-HRD
TCGA-21-1078-01	2	1	2	5	non-HRD
TCGA-21-1079-01	16	12	8	36	non-HRD
TCGA-21-1080-01	16	5	11	32	non-HRD
TCGA-21-1081-01	12	6	13	31	non-HRD
TCGA-21-1082-01	18	12	16	46	HRD
TCGA-21-1083-01	19	14	13	46	HRD
TCGA-21-5782-01	18	19	15	52	HRD
TCGA-21-5783-01	19	7	8	34	non-HRD
TCGA-21-5784-01	5	4	5	14	non-HRD
TCGA-21-5786-01	21	9	16	46	HRD
TCGA-21-5787-01	20	18	12	50	HRD
TCGA-21-A5DI-01	11	7	8	26	non-HRD
TCGA-22-0940-01	15	11	14	40	non-HRD
TCGA-22-0944-01	15	8	13	36	non-HRD
TCGA-22-1000-01	4	2	3	9	non-HRD
TCGA-22-1002-01	6	2	7	15	non-HRD
TCGA-22-1005-01	3	4	4	11	non-HRD
TCGA-22-1011-01	4	2	4	10	non-HRD
TCGA-22-1012-01	21	19	9	49	HRD
TCGA-22-1016-01	16	8	10	34	non-HRD
TCGA-22-1017-01	16	16	10	42	HRD
TCGA-22-4591-01	20	16	16	52	HRD
TCGA-22-4593-01	14	10	7	31	non-HRD
TCGA-22-4594-01	24	24	3	51	HRD
TCGA-22-4595-01	24	32	24	80	HRD
TCGA-22-4596-01	7	5	0	12	non-HRD
TCGA-22-4599-01	17	4	12	33	non-HRD
TCGA-22-4601-01	16	17	12	45	HRD
TCGA-22-4604-01	18	16	0	34	non-HRD
TCGA-22-4605-01	7	4	3	14	non-HRD
TCGA-22-4607-01	7	3	4	14	non-HRD
TCGA-22-4609-01	10	2	11	23	non-HRD
TCGA-22-4613-01	17	11	14	42	HRD
TCGA-22-5471-01	21	13	14	48	HRD
TCGA-22-5472-01	3	1	3	7	non-HRD
TCGA-22-5473-01	19	13	13	45	HRD
TCGA-22-5474-01	8	4	6	18	non-HRD
TCGA-22-5477-01	19	12	14	45	HRD
TCGA-22-5478-01	14	5	3	22	non-HRD
TCGA-22-5479-01	10	4	4	18	non-HRD
TCGA-22-5480-01	8	4	3	15	non-HRD
TCGA-22-5481-01	22	18	12	52	HRD
TCGA-22-5482-01	15	8	8	31	non-HRD
TCGA-22-5483-01	16	6	11	33	non-HRD
TCGA-22-5485-01	12	6	6	24	non-HRD
TCGA-22-5489-01	14	10	7	31	non-HRD
TCGA-22-5491-01	17	11	8	36	non-HRD
TCGA-22-5492-01	12	8	13	33	non-HRD
TCGA-22-A5C4-01	17	16	21	54	HRD
TCGA-23-1021-01	14	17	13	44	HRD
TCGA-23-1022-01	29	43	14	86	HRD
TCGA-23-1023-01	16	18	8	42	HRD
TCGA-23-1024-01	19	16	3	38	non-HRD
TCGA-23-1026-01	25	24	14	63	HRD
TCGA-23-1027-01	23	24	18	65	HRD
TCGA-23-1028-01	31	26	17	74	HRD
TCGA-23-1029-01	19	17	8	44	HRD
TCGA-23-1030-01	13	8	3	24	non-HRD
TCGA-23-1031-01	26	34	10	70	HRD
TCGA-23-1032-01	21	20	6	47	HRD
TCGA-23-1109-01	13	12	5	30	non-HRD
TCGA-23-1110-01	21	30	8	59	HRD
TCGA-23-1111-01	15	5	2	22	non-HRD
TCGA-23-1113-01	3	2	2	7	non-HRD
TCGA-23-1114-01	20	24	3	47	HRD
TCGA-23-1116-01	17	13	2	32	non-HRD
TCGA-23-1117-01	33	35	15	83	HRD
TCGA-23-1118-01	23	25	18	66	HRD
TCGA-23-1119-01	25	30	5	60	HRD
TCGA-23-1120-01	22	24	13	59	HRD
TCGA-23-1121-01	31	34	14	79	HRD
TCGA-23-1123-01	14	18	6	38	non-HRD
TCGA-23-1124-01	35	29	14	78	HRD
TCGA-23-1809-01	25	15	14	54	HRD
TCGA-23-2072-01	13	7	5	25	non-HRD
TCGA-23-2077-01	31	31	11	73	HRD
TCGA-23-2078-01	23	22	12	57	HRD
TCGA-23-2079-01	30	25	16	71	HRD
TCGA-23-2081-01	20	22	15	57	HRD
TCGA-23-2084-01	23	27	6	56	HRD
TCGA-23-2641-01	20	28	17	65	HRD
TCGA-23-2643-01	11	12	5	28	non-HRD
TCGA-23-2645-01	25	39	13	77	HRD
TCGA-24-0966-01	14	8	8	30	non-HRD
TCGA-24-0968-01	22	27	10	59	HRD
TCGA-24-0970-01	17	9	6	32	non-HRD
TCGA-24-0975-01	23	22	17	62	HRD
TCGA-24-0979-01	22	37	9	68	HRD
TCGA-24-0980-01	12	10	8	30	non-HRD
TCGA-24-0982-01	16	16	9	41	non-HRD
TCGA-24-1103-01	22	28	15	65	HRD
TCGA-24-1104-01	20	30	12	62	HRD
TCGA-24-1105-01	15	5	3	23	non-HRD
TCGA-24-1413-01	13	8	10	31	non-HRD
TCGA-24-1416-01	6	5	4	15	non-HRD
TCGA-24-1417-01	27	24	17	68	HRD
TCGA-24-1418-01	15	14	6	35	non-HRD
TCGA-24-1419-01	13	11	4	28	non-HRD
TCGA-24-1422-01	26	35	17	78	HRD
TCGA-24-1423-01	22	19	14	55	HRD
TCGA-24-1424-01	24	20	4	48	HRD
TCGA-24-1425-01	22	23	14	59	HRD
TCGA-24-1426-01	8	7	7	22	non-HRD
TCGA-24-1427-01	27	20	16	63	HRD
TCGA-24-1428-01	32	28	24	84	HRD
TCGA-24-1430-01	25	24	19	68	HRD
TCGA-24-1431-01	15	10	4	29	non-HRD
TCGA-24-1434-01	13	10	3	26	non-HRD
TCGA-24-1435-01	26	28	15	69	HRD
TCGA-24-1436-01	17	15	9	41	non-HRD
TCGA-24-1463-01	20	21	13	54	HRD
TCGA-24-1464-01	9	10	6	25	non-HRD
TCGA-24-1466-01	22	9	13	44	HRD
TCGA-24-1467-01	11	10	6	27	non-HRD
TCGA-24-1469-01	22	21	11	54	HRD
TCGA-24-1470-01	24	26	19	69	HRD
TCGA-24-1471-01	4	3	1	8	non-HRD
TCGA-24-1474-01	17	17	2	36	non-HRD
TCGA-24-1544-01	15	13	5	33	non-HRD
TCGA-24-1545-01	10	8	7	25	non-HRD
TCGA-24-1546-01	24	25	18	67	HRD
TCGA-24-1548-01	9	2	4	15	non-HRD
TCGA-24-1549-01	14	9	8	31	non-HRD
TCGA-24-1550-01	23	21	20	64	HRD
TCGA-24-1551-01	17	14	2	33	non-HRD
TCGA-24-1552-01	13	10	4	27	non-HRD
TCGA-24-1553-01	23	13	12	48	HRD
TCGA-24-1555-01	12	18	8	38	non-HRD
TCGA-24-1556-01	25	38	15	78	HRD
TCGA-24-1557-01	30	34	14	78	HRD
TCGA-24-1558-01	18	15	6	39	non-HRD
TCGA-24-1562-01	11	9	9	29	non-HRD
TCGA-24-1563-01	21	26	10	57	HRD
TCGA-24-1564-01	12	11	6	29	non-HRD
TCGA-24-1565-01	7	4	6	17	non-HRD
TCGA-24-1567-01	27	30	17	74	HRD
TCGA-24-1603-01	13	10	8	31	non-HRD
TCGA-24-1604-01	25	19	6	50	HRD
TCGA-24-1614-01	28	27	20	75	HRD
TCGA-24-1616-01	11	13	4	28	non-HRD
TCGA-24-1842-01	21	11	7	39	non-HRD
TCGA-24-1843-01	12	6	3	21	non-HRD
TCGA-24-1844-01	19	20	5	44	HRD
TCGA-24-1845-01	27	45	11	83	HRD
TCGA-24-1846-01	21	21	16	58	HRD
TCGA-24-1847-01	25	33	9	67	HRD
TCGA-24-1849-01	19	25	13	57	HRD
TCGA-24-1850-01	21	19	13	53	HRD
TCGA-24-1852-01	20	16	7	43	HRD
TCGA-24-1923-01	9	5	1	15	non-HRD
TCGA-24-1927-01	22	24	12	58	HRD
TCGA-24-1928-01	14	6	3	23	non-HRD
TCGA-24-1930-01	19	21	7	47	HRD
TCGA-24-2019-01	18	11	4	33	non-HRD
TCGA-24-2020-01	29	32	8	69	HRD
TCGA-24-2023-01	14	6	15	35	non-HRD
TCGA-24-2024-01	17	28	14	59	HRD
TCGA-24-2026-01	12	12	6	30	non-HRD
TCGA-24-2027-01	24	25	14	63	HRD
TCGA-24-2029-01	8	8	5	21	non-HRD
TCGA-24-2030-01	22	21	13	56	HRD
TCGA-24-2033-01	16	21	3	40	non-HRD
TCGA-24-2035-01	18	26	14	58	HRD
TCGA-24-2036-01	19	17	13	49	HRD
TCGA-24-2038-01	1	0	0	1	non-HRD
TCGA-24-2254-01	23	20	16	59	HRD
TCGA-24-2260-01	23	13	11	47	HRD
TCGA-24-2261-01	15	7	10	32	non-HRD
TCGA-24-2262-01	13	14	11	38	non-HRD
TCGA-24-2267-01	20	41	9	70	HRD
TCGA-24-2271-01	9	8	3	20	non-HRD
TCGA-24-2280-01	28	35	5	68	HRD
TCGA-24-2281-01	11	15	5	31	non-HRD
TCGA-24-2288-01	27	26	22	75	HRD
TCGA-24-2289-01	30	28	17	75	HRD
TCGA-24-2290-01	25	31	16	72	HRD
TCGA-24-2293-01	16	19	5	40	non-HRD
TCGA-24-2295-01	20	16	1	37	non-HRD
TCGA-24-2297-01	28	34	30	92	HRD
TCGA-24-2298-01	32	21	19	72	HRD
TCGA-25-1312-01	15	8	2	25	non-HRD
TCGA-25-1313-01	29	31	16	76	HRD
TCGA-25-1314-01	22	27	10	59	HRD
TCGA-25-1315-01	21	21	10	52	HRD
TCGA-25-1316-01	1	0	0	1	non-HRD
TCGA-25-1317-01	7	4	0	11	non-HRD
TCGA-25-1318-01	25	25	7	57	HRD
TCGA-25-1319-01	11	7	1	19	non-HRD
TCGA-25-1320-01	20	9	0	29	non-HRD
TCGA-25-1321-01	21	13	11	45	HRD
TCGA-25-1322-01	15	10	3	28	non-HRD
TCGA-25-1323-01	22	16	4	42	HRD
TCGA-25-1329-01	8	9	1	18	non-HRD
TCGA-25-1623-01	12	6	7	25	non-HRD
TCGA-25-1625-01	20	18	14	52	HRD
TCGA-25-1626-01	8	9	2	19	non-HRD
TCGA-25-1627-01	18	8	8	34	non-HRD
TCGA-25-1628-01	6	6	3	15	non-HRD
TCGA-25-1630-01	25	24	13	62	HRD
TCGA-25-1631-01	7	7	5	19	non-HRD
TCGA-25-1632-01	18	21	7	46	HRD
TCGA-25-1633-01	15	9	9	33	non-HRD
TCGA-25-1634-01	11	11	2	24	non-HRD
TCGA-25-1635-01	15	11	7	33	non-HRD
TCGA-25-1870-01	9	4	2	15	non-HRD
TCGA-25-1871-01	23	11	5	39	non-HRD
TCGA-25-1877-01	17	9	8	34	non-HRD
TCGA-25-1878-01	23	22	10	55	HRD
TCGA-25-2042-01	22	20	9	51	HRD
TCGA-25-2391-01	20	16	13	49	HRD
TCGA-25-2392-01	23	23	9	55	HRD
TCGA-25-2393-01	17	10	6	33	non-HRD
TCGA-25-2396-01	16	6	7	29	non-HRD
TCGA-25-2397-01	30	26	19	75	HRD
TCGA-25-2398-01	20	10	2	32	non-HRD
TCGA-25-2399-01	10	6	5	21	non-HRD
TCGA-25-2400-01	20	9	8	37	non-HRD
TCGA-25-2401-01	21	25	14	60	HRD
TCGA-25-2404-01	16	17	9	42	HRD
TCGA-25-2408-01	4	3	3	10	non-HRD
TCGA-25-2409-01	14	15	10	39	non-HRD
TCGA-26-1438-01	4	6	5	15	non-HRD
TCGA-26-1439-01	1	0	1	2	non-HRD
TCGA-26-1440-01	2	1	0	3	non-HRD
TCGA-26-1442-01	4	2	2	8	non-HRD
TCGA-26-1443-01	2	1	2	5	non-HRD
TCGA-26-1799-01	0	2	0	2	non-HRD
TCGA-26-5132-01	1	3	4	8	non-HRD
TCGA-26-5133-01	4	2	10	16	non-HRD
TCGA-26-5134-01	1	0	0	1	non-HRD
TCGA-26-5135-01	0	0	0	0	non-HRD
TCGA-26-5136-01	3	3	2	8	non-HRD
TCGA-26-5139-01	0	1	0	1	non-HRD
TCGA-26-6173-01	3	4	4	11	non-HRD
TCGA-26-6174-01	3	4	4	11	non-HRD
TCGA-26-A7UX-01	0	3	1	4	non-HRD
TCGA-27-1830-01	2	2	1	5	non-HRD
TCGA-27-1831-01	1	2	2	5	non-HRD
TCGA-27-1832-01	4	3	2	9	non-HRD
TCGA-27-1833-01	3	2	3	8	non-HRD
TCGA-27-1834-01	2	0	0	2	non-HRD
TCGA-27-1835-01	2	3	3	8	non-HRD
TCGA-27-1836-01	4	2	3	9	non-HRD
TCGA-27-1837-01	1	0	1	2	non-HRD
TCGA-27-1838-01	7	3	5	15	non-HRD
TCGA-27-2518-01	0	0	0	0	non-HRD
TCGA-27-2519-01	3	1	3	7	non-HRD
TCGA-27-2521-01	13	10	7	30	non-HRD
TCGA-27-2523-01	6	6	4	16	non-HRD
TCGA-27-2524-01	4	6	5	15	non-HRD
TCGA-27-2526-01	3	1	3	7	non-HRD
TCGA-27-2527-01	0	1	0	1	non-HRD
TCGA-27-2528-01	3	4	0	7	non-HRD
TCGA-28-1746-01	3	2	0	5	non-HRD
TCGA-28-1747-01	2	3	1	6	non-HRD
TCGA-28-1749-01	1	0	0	1	non-HRD
TCGA-28-1750-01	2	2	3	7	non-HRD
TCGA-28-1751-01	1	0	1	2	non-HRD
TCGA-28-1752-01	0	4	4	8	non-HRD
TCGA-28-1753-01	1	3	0	4	non-HRD
TCGA-28-1755-01	4	3	4	11	non-HRD
TCGA-28-1756-01	7	7	6	20	non-HRD
TCGA-28-1757-01	2	5	3	10	non-HRD
TCGA-28-2501-01	2	5	5	12	non-HRD
TCGA-28-2502-01	3	4	4	11	non-HRD
TCGA-28-2506-01	0	0	0	0	non-HRD
TCGA-28-2509-01	0	0	1	1	non-HRD
TCGA-28-2510-01	1	3	1	5	non-HRD
TCGA-28-2513-01	1	5	3	9	non-HRD
TCGA-28-2514-01	2	3	2	7	non-HRD
TCGA-28-5204-01	5	4	7	16	non-HRD
TCGA-28-5207-01	2	4	1	7	non-HRD
TCGA-28-5208-01	1	3	2	6	non-HRD
TCGA-28-5209-01	2	0	3	5	non-HRD
TCGA-28-5211-01	2	2	2	6	non-HRD
TCGA-28-5213-01	3	3	3	9	non-HRD
TCGA-28-5214-01	3	2	1	6	non-HRD
TCGA-28-5215-01	2	0	1	3	non-HRD
TCGA-28-5216-01	0	0	2	2	non-HRD
TCGA-28-5218-01	1	0	1	2	non-HRD
TCGA-28-5219-01	3	2	1	6	non-HRD
TCGA-28-5220-01	2	6	3	11	non-HRD
TCGA-28-6450-01	2	2	1	5	non-HRD
TCGA-29-1688-01	23	25	14	62	HRD
TCGA-29-1690-01	1	2	1	4	non-HRD
TCGA-29-1691-01	28	48	19	95	HRD
TCGA-29-1692-01	26	24	8	58	HRD
TCGA-29-1693-01	18	15	12	45	HRD
TCGA-29-1694-01	19	18	12	49	HRD
TCGA-29-1695-01	18	8	3	29	non-HRD
TCGA-29-1696-01	18	22	12	52	HRD
TCGA-29-1697-01	15	8	6	29	non-HRD
TCGA-29-1698-01	25	15	8	48	HRD
TCGA-29-1699-01	22	15	3	40	non-HRD
TCGA-29-1701-01	19	14	10	43	HRD
TCGA-29-1702-01	21	12	12	45	HRD
TCGA-29-1703-01	14	11	5	30	non-HRD
TCGA-29-1704-01	22	24	15	61	HRD
TCGA-29-1705-01	20	25	12	57	HRD
TCGA-29-1707-01	21	18	14	53	HRD
TCGA-29-1710-01	11	6	4	21	non-HRD
TCGA-29-1711-01	26	31	19	76	HRD
TCGA-29-1761-01	24	16	9	49	HRD
TCGA-29-1762-01	19	15	12	46	HRD
TCGA-29-1763-01	22	28	19	69	HRD
TCGA-29-1764-01	21	26	9	56	HRD
TCGA-29-1766-01	18	13	5	36	non-HRD
TCGA-29-1768-01	20	22	12	54	HRD
TCGA-29-1769-01	17	27	15	59	HRD
TCGA-29-1770-01	20	28	12	60	HRD
TCGA-29-1771-01	2	3	3	8	non-HRD
TCGA-29-1774-01	12	8	5	25	non-HRD
TCGA-29-1775-01	23	24	9	56	HRD
TCGA-29-1776-01	17	20	11	48	HRD
TCGA-29-1777-01	31	23	20	74	HRD
TCGA-29-1778-01	22	10	2	34	non-HRD
TCGA-29-1781-01	27	27	18	72	HRD
TCGA-29-1783-01	13	7	2	22	non-HRD
TCGA-29-1784-01	25	42	8	75	HRD
TCGA-29-1785-01	14	20	8	42	HRD
TCGA-29-2414-01	21	35	7	63	HRD
TCGA-29-2425-01	23	37	8	68	HRD
TCGA-29-2427-01	12	14	14	40	non-HRD
TCGA-29-2428-01	12	11	3	26	non-HRD
TCGA-29-2429-01	21	16	11	48	HRD
TCGA-29-2431-01	16	18	5	39	non-HRD
TCGA-29-2432-01	19	23	7	49	HRD
TCGA-29-2434-01	29	34	17	80	HRD
TCGA-29-2436-01	5	7	5	17	non-HRD
TCGA-29-A5NZ-01	15	11	6	32	non-HRD
TCGA-2A-A8VL-01	2	3	2	7	non-HRD
TCGA-2A-A8VO-01	0	3	2	5	non-HRD
TCGA-2A-A8VT-01	7	7	5	19	non-HRD
TCGA-2A-A8VV-01	0	0	0	0	non-HRD
TCGA-2A-A8VX-01	1	4	1	6	non-HRD
TCGA-2A-A8W1-01	1	6	3	10	non-HRD
TCGA-2A-A8W3-01	5	3	3	11	non-HRD
TCGA-2A-AAYF-01	0	4	2	6	non-HRD
TCGA-2A-AAYO-01	1	2	3	6	non-HRD
TCGA-2A-AAYU-01	2	3	2	7	non-HRD
TCGA-2E-A9G8-01	15	11	14	40	non-HRD
TCGA-2F-A9KO-01	16	13	12	41	non-HRD
TCGA-2F-A9KP-01	12	10	6	28	non-HRD
TCGA-2F-A9KQ-01	4	2	3	9	non-HRD
TCGA-2F-A9KR-01	4	2	4	10	non-HRD
TCGA-2F-A9KT-01	12	9	5	26	non-HRD
TCGA-2F-A9KW-01	19	16	13	48	HRD
TCGA-2G-AAEW-01	1	2	1	4	non-HRD
TCGA-2G-AAEX-01	9	4	3	16	non-HRD
TCGA-2G-AAF1-01	7	2	0	9	non-HRD
TCGA-2G-AAF4-01	7	7	1	15	non-HRD
TCGA-2G-AAF6-01	9	8	5	22	non-HRD
TCGA-2G-AAF8-01	10	12	2	24	non-HRD
TCGA-2G-AAFG-01	5	7	1	13	non-HRD
TCGA-2G-AAFG-05	7	6	1	14	non-HRD
TCGA-2G-AAFH-01	12	10	2	24	non-HRD
TCGA-2G-AAFI-01	8	5	2	15	non-HRD
TCGA-2G-AAFJ-01	8	6	2	16	non-HRD
TCGA-2G-AAFL-01	7	3	2	12	non-HRD
TCGA-2G-AAFM-01	12	10	6	28	non-HRD
TCGA-2G-AAFN-01	4	6	1	11	non-HRD
TCGA-2G-AAFO-01	12	13	7	32	non-HRD
TCGA-2G-AAFV-01	9	7	7	23	non-HRD
TCGA-2G-AAFY-01	5	4	1	10	non-HRD
TCGA-2G-AAFZ-01	6	6	7	19	non-HRD
TCGA-2G-AAG0-01	12	10	4	26	non-HRD
TCGA-2G-AAG3-01	7	5	3	15	non-HRD
TCGA-2G-AAG5-01	5	4	2	11	non-HRD
TCGA-2G-AAG6-01	6	5	2	13	non-HRD
TCGA-2G-AAG7-01	9	8	6	23	non-HRD
TCGA-2G-AAG8-01	13	4	1	18	non-HRD
TCGA-2G-AAG9-01	7	6	6	19	non-HRD
TCGA-2G-AAGA-01	10	7	0	17	non-HRD
TCGA-2G-AAGC-01	5	1	1	7	non-HRD
TCGA-2G-AAGE-01	5	6	1	12	non-HRD
TCGA-2G-AAGF-01	6	4	1	11	non-HRD
TCGA-2G-AAGG-01	8	6	3	17	non-HRD
TCGA-2G-AAGI-01	5	6	1	12	non-HRD
TCGA-2G-AAGI-05	4	6	1	11	non-HRD
TCGA-2G-AAGJ-01	13	9	4	26	non-HRD
TCGA-2G-AAGK-01	4	4	1	9	non-HRD
TCGA-2G-AAGM-01	4	2	0	6	non-HRD
TCGA-2G-AAGN-01	4	1	3	8	non-HRD
TCGA-2G-AAGO-01	12	11	9	32	non-HRD
TCGA-2G-AAGP-01	15	12	6	33	non-HRD
TCGA-2G-AAGS-01	8	7	0	15	non-HRD
TCGA-2G-AAGT-01	12	7	6	25	non-HRD
TCGA-2G-AAGV-01	3	1	0	4	non-HRD
TCGA-2G-AAGW-01	13	12	6	31	non-HRD
TCGA-2G-AAGX-01	6	6	2	14	non-HRD
TCGA-2G-AAGY-01	7	7	2	16	non-HRD
TCGA-2G-AAGY-05	12	10	3	25	non-HRD
TCGA-2G-AAGZ-01	9	8	3	20	non-HRD
TCGA-2G-AAH0-01	10	8	2	20	non-HRD
TCGA-2G-AAH2-01	4	3	2	9	non-HRD
TCGA-2G-AAH3-01	3	2	1	6	non-HRD
TCGA-2G-AAH4-01	10	7	2	19	non-HRD
TCGA-2G-AAH8-01	7	15	1	23	non-HRD
TCGA-2G-AAHA-01	2	0	1	3	non-HRD
TCGA-2G-AAHC-01	7	7	3	17	non-HRD
TCGA-2G-AAHG-01	5	4	1	10	non-HRD
TCGA-2G-AAHL-01	5	2	3	10	non-HRD
TCGA-2G-AAHN-01	5	3	0	8	non-HRD
TCGA-2G-AAHP-01	9	10	1	20	non-HRD
TCGA-2G-AAHP-05	9	7	5	21	non-HRD
TCGA-2G-AAHT-01	10	10	2	22	non-HRD
TCGA-2G-AAKD-01	10	10	2	22	non-HRD
TCGA-2G-AAKG-01	4	3	3	10	non-HRD
TCGA-2G-AAKG-05	8	9	1	18	non-HRD
TCGA-2G-AAKH-01	20	12	5	37	non-HRD
TCGA-2G-AAKL-01	10	5	1	16	non-HRD
TCGA-2G-AAKM-01	8	3	4	15	non-HRD
TCGA-2G-AAKO-01	5	10	0	15	non-HRD
TCGA-2G-AAKO-05	2	1	0	3	non-HRD
TCGA-2G-AAL5-01	5	3	3	11	non-HRD
TCGA-2G-AAL7-01	2	1	0	3	non-HRD
TCGA-2G-AALF-01	7	9	2	18	non-HRD
TCGA-2G-AALG-01	7	8	2	17	non-HRD
TCGA-2G-AALN-01	9	10	4	23	non-HRD
TCGA-2G-AALO-01	6	3	1	10	non-HRD
TCGA-2G-AALP-01	8	5	1	14	non-HRD
TCGA-2G-AALQ-01	4	3	3	10	non-HRD
TCGA-2G-AALR-01	9	8	2	19	non-HRD
TCGA-2G-AALS-01	8	6	3	17	non-HRD
TCGA-2G-AALT-01	3	2	1	6	non-HRD
TCGA-2G-AALW-01	6	3	1	10	non-HRD
TCGA-2G-AALX-01	7	5	6	18	non-HRD
TCGA-2G-AALY-01	8	7	4	19	non-HRD
TCGA-2G-AALZ-01	6	6	2	14	non-HRD
TCGA-2G-AAM2-01	4	1	3	8	non-HRD
TCGA-2G-AAM3-01	3	1	2	6	non-HRD
TCGA-2G-AAM4-01	8	3	3	14	non-HRD
TCGA-2H-A9GF-01	17	20	12	49	HRD
TCGA-2H-A9GI-01	13	9	13	35	non-HRD
TCGA-2H-A9GJ-01	10	9	9	28	non-HRD
TCGA-2H-A9GK-01	14	13	12	39	non-HRD
TCGA-2H-A9GL-01	22	14	8	44	HRD
TCGA-2H-A9GN-01	11	15	8	34	non-HRD
TCGA-2H-A9GO-01	12	8	16	36	non-HRD
TCGA-2H-A9GQ-01	15	10	7	32	non-HRD
TCGA-2H-A9GR-01	18	11	15	44	HRD
TCGA-2J-AAB1-01	2	2	4	8	non-HRD
TCGA-2J-AAB4-01	13	6	10	29	non-HRD
TCGA-2J-AAB6-01	8	1	5	14	non-HRD
TCGA-2J-AAB8-01	10	7	10	27	non-HRD
TCGA-2J-AAB9-01	0	0	0	0	non-HRD
TCGA-2J-AABA-01	6	3	6	15	non-HRD
TCGA-2J-AABE-01	7	3	6	16	non-HRD
TCGA-2J-AABF-01	4	6	5	15	non-HRD
TCGA-2J-AABH-01	15	6	12	33	non-HRD
TCGA-2J-AABI-01	8	1	9	18	non-HRD
TCGA-2J-AABO-01	13	3	6	22	non-HRD
TCGA-2J-AABP-01	28	19	15	62	HRD
TCGA-2J-AABT-01	5	1	4	10	non-HRD
TCGA-2J-AABU-01	13	6	10	29	non-HRD
TCGA-2J-AABV-01	1	0	1	2	non-HRD
TCGA-2K-A9WE-01	4	0	0	4	non-HRD
TCGA-2L-AAQA-01	7	4	7	18	non-HRD
TCGA-2L-AAQE-01	10	4	9	23	non-HRD
TCGA-2L-AAQI-01	7	7	7	21	non-HRD
TCGA-2L-AAQJ-01	9	10	7	26	non-HRD
TCGA-2L-AAQL-01	7	5	11	23	non-HRD
TCGA-2L-AAQM-01	1	1	1	3	non-HRD
TCGA-2V-A95S-01	7	4	3	14	non-HRD
TCGA-2W-A8YY-01	2	2	2	6	non-HRD
TCGA-2X-A9D5-01	9	2	4	15	non-HRD
TCGA-2X-A9D6-01	2	2	2	6	non-HRD
TCGA-2Y-A9GS-01	4	0	5	9	non-HRD
TCGA-2Y-A9GT-01	1	0	1	2	non-HRD
TCGA-2Y-A9GU-01	8	6	3	17	non-HRD
TCGA-2Y-A9GV-01	3	9	7	19	non-HRD
TCGA-2Y-A9GW-01	7	4	1	12	non-HRD
TCGA-2Y-A9GX-01	8	5	5	18	non-HRD
TCGA-2Y-A9GY-01	10	8	6	24	non-HRD
TCGA-2Y-A9GZ-01	6	11	5	22	non-HRD
TCGA-2Y-A9H0-01	7	4	5	16	non-HRD
TCGA-2Y-A9H1-01	4	3	2	9	non-HRD
TCGA-2Y-A9H2-01	15	11	8	34	non-HRD
TCGA-2Y-A9H3-01	10	10	2	22	non-HRD
TCGA-2Y-A9H4-01	7	6	6	19	non-HRD
TCGA-2Y-A9H5-01	7	9	9	25	non-HRD
TCGA-2Y-A9H6-01	8	3	7	18	non-HRD
TCGA-2Y-A9H7-01	4	3	3	10	non-HRD
TCGA-2Y-A9H8-01	17	10	13	40	non-HRD
TCGA-2Y-A9H9-01	2	5	4	11	non-HRD
TCGA-2Y-A9HA-01	7	6	8	21	non-HRD
TCGA-2Y-A9HB-01	3	1	2	6	non-HRD
TCGA-2Z-A9J1-01	0	0	0	0	non-HRD
TCGA-2Z-A9J2-01	3	2	2	7	non-HRD
TCGA-2Z-A9J3-01	3	0	1	4	non-HRD
TCGA-2Z-A9J5-01	0	0	0	0	non-HRD
TCGA-2Z-A9J6-01	0	0	0	0	non-HRD
TCGA-2Z-A9J7-01	1	1	1	3	non-HRD
TCGA-2Z-A9J8-01	3	2	5	10	non-HRD
TCGA-2Z-A9J9-01	0	0	0	0	non-HRD
TCGA-2Z-A9JD-01	0	0	0	0	non-HRD
TCGA-2Z-A9JE-01	0	0	0	0	non-HRD
TCGA-2Z-A9JG-01	0	0	0	0	non-HRD
TCGA-2Z-A9JI-01	10	0	12	22	non-HRD
TCGA-2Z-A9JJ-01	4	3	3	10	non-HRD
TCGA-2Z-A9JK-01	2	1	1	4	non-HRD
TCGA-2Z-A9JL-01	0	1	0	1	non-HRD
TCGA-2Z-A9JM-01	0	0	0	0	non-HRD
TCGA-2Z-A9JN-01	0	0	0	0	non-HRD
TCGA-2Z-A9JO-01	0	0	0	0	non-HRD
TCGA-2Z-A9JP-01	0	0	0	0	non-HRD
TCGA-2Z-A9JQ-01	0	0	0	0	non-HRD
TCGA-2Z-A9JR-01	1	1	0	2	non-HRD
TCGA-2Z-A9JS-01	0	0	0	0	non-HRD
TCGA-2Z-A9JT-01	0	0	0	0	non-HRD
TCGA-30-1714-01	19	15	1	35	non-HRD
TCGA-30-1718-01	30	36	7	73	HRD
TCGA-30-1853-01	13	5	5	23	non-HRD
TCGA-30-1855-01	25	26	17	68	HRD
TCGA-30-1856-01	25	12	28	65	HRD
TCGA-30-1857-01	19	27	12	58	HRD
TCGA-30-1859-01	11	8	3	22	non-HRD
TCGA-30-1860-01	29	38	31	98	HRD
TCGA-30-1861-01	29	37	14	80	HRD
TCGA-30-1862-01	16	7	9	32	non-HRD
TCGA-30-1866-01	15	6	3	24	non-HRD
TCGA-30-1867-01	17	12	7	36	non-HRD
TCGA-30-1880-01	3	2	5	10	non-HRD
TCGA-30-1887-01	13	3	5	21	non-HRD
TCGA-30-1891-01	24	31	17	72	HRD
TCGA-30-1892-01	14	17	9	40	non-HRD
TCGA-31-1944-01	18	26	12	56	HRD
TCGA-31-1946-01	19	23	18	60	HRD
TCGA-31-1950-01	15	8	4	27	non-HRD
TCGA-31-1951-01	15	11	10	36	non-HRD
TCGA-31-1953-01	17	17	5	39	non-HRD
TCGA-31-1955-01	16	14	11	41	non-HRD
TCGA-31-1956-01	18	14	13	45	HRD
TCGA-31-1959-01	20	17	29	66	HRD
TCGA-32-1970-01	5	1	2	8	non-HRD
TCGA-32-1973-01	10	11	11	32	non-HRD
TCGA-32-1976-01	4	2	3	9	non-HRD
TCGA-32-1977-01	3	4	2	9	non-HRD
TCGA-32-1978-01	7	8	21	36	non-HRD
TCGA-32-1979-01	1	1	1	3	non-HRD
TCGA-32-1980-01	0	0	0	0	non-HRD
TCGA-32-1982-01	1	0	0	1	non-HRD
TCGA-32-1986-01	1	3	4	8	non-HRD
TCGA-32-1987-01	8	6	7	21	non-HRD
TCGA-32-1991-01	4	3	7	14	non-HRD
TCGA-32-2491-01	1	2	2	5	non-HRD
TCGA-32-2494-01	2	6	4	12	non-HRD
TCGA-32-2495-01	3	2	1	6	non-HRD
TCGA-32-2615-01	1	3	5	9	non-HRD
TCGA-32-2616-01	5	1	2	8	non-HRD
TCGA-32-2632-01	7	1	1	9	non-HRD
TCGA-32-2634-01	3	4	4	11	non-HRD
TCGA-32-2638-01	1	1	0	2	non-HRD
TCGA-32-4208-01	7	4	5	16	non-HRD
TCGA-32-4210-01	9	3	2	14	non-HRD
TCGA-32-4211-01	1	3	2	6	non-HRD
TCGA-32-4213-01	0	2	3	5	non-HRD
TCGA-32-4719-01	1	0	1	2	non-HRD
TCGA-32-5222-01	2	1	1	4	non-HRD
TCGA-33-4532-01	20	14	11	45	HRD
TCGA-33-4533-01	12	11	9	32	non-HRD
TCGA-33-4538-01	12	12	12	36	non-HRD
TCGA-33-4547-01	19	11	12	42	HRD
TCGA-33-4566-01	18	11	16	45	HRD
TCGA-33-4582-01	25	29	18	72	HRD
TCGA-33-4583-01	9	3	7	19	non-HRD
TCGA-33-4586-01	17	5	11	33	non-HRD
TCGA-33-4587-01	19	18	7	44	HRD
TCGA-33-4589-01	10	6	5	21	non-HRD
TCGA-33-6737-01	15	10	4	29	non-HRD
TCGA-33-6738-01	14	3	10	27	non-HRD
TCGA-33-A4WN-01	13	9	8	30	non-HRD
TCGA-33-A5GW-01	10	13	10	33	non-HRD
TCGA-33-AAS8-01	6	8	11	25	non-HRD
TCGA-33-AASB-01	21	15	17	53	HRD
TCGA-33-AASD-01	23	8	15	46	HRD
TCGA-33-AASI-01	13	9	14	36	non-HRD
TCGA-33-AASJ-01	19	12	14	45	HRD
TCGA-33-AASL-01	22	19	20	61	HRD
TCGA-34-2596-01	15	7	12	34	non-HRD
TCGA-34-2600-01	13	11	10	34	non-HRD
TCGA-34-2604-01	16	7	8	31	non-HRD
TCGA-34-2605-01	20	12	8	40	non-HRD
TCGA-34-2608-01	7	2	4	13	non-HRD
TCGA-34-2609-01	17	19	6	42	HRD
TCGA-34-5231-01	16	10	11	37	non-HRD
TCGA-34-5232-01	2	3	5	10	non-HRD
TCGA-34-5234-01	2	4	1	7	non-HRD
TCGA-34-5236-01	14	6	7	27	non-HRD
TCGA-34-5239-01	4	2	5	11	non-HRD
TCGA-34-5240-01	14	6	7	27	non-HRD
TCGA-34-5241-01	10	3	1	14	non-HRD
TCGA-34-5927-01	6	3	8	17	non-HRD
TCGA-34-5928-01	24	15	22	61	HRD
TCGA-34-5929-01	8	3	7	18	non-HRD
TCGA-34-7107-01	17	8	7	32	non-HRD
TCGA-34-8454-01	17	9	9	35	non-HRD
TCGA-34-8455-01	7	4	5	16	non-HRD
TCGA-34-8456-01	19	11	9	39	non-HRD
TCGA-34-A5IX-01	13	12	16	41	non-HRD
TCGA-35-3615-01	4	2	1	7	non-HRD
TCGA-35-4122-01	12	14	9	35	non-HRD
TCGA-35-4123-01	8	6	9	23	non-HRD
TCGA-35-5375-01	16	20	9	45	HRD
TCGA-36-1568-01	23	29	12	64	HRD
TCGA-36-1569-01	16	20	4	40	non-HRD
TCGA-36-1570-01	22	25	12	59	HRD
TCGA-36-1571-01	14	6	5	25	non-HRD
TCGA-36-1574-01	23	22	18	63	HRD
TCGA-36-1575-01	11	8	8	27	non-HRD
TCGA-36-1576-01	15	5	6	26	non-HRD
TCGA-36-1577-01	27	25	19	71	HRD
TCGA-36-1578-01	28	39	19	86	HRD
TCGA-36-1580-01	21	16	11	48	HRD
TCGA-36-1581-01	15	11	10	36	non-HRD
TCGA-36-2530-01	27	31	15	73	HRD
TCGA-36-2532-01	12	9	8	29	non-HRD
TCGA-36-2533-01	21	32	10	63	HRD
TCGA-36-2534-01	24	28	23	75	HRD
TCGA-36-2537-01	21	17	9	47	HRD
TCGA-36-2538-01	22	28	19	69	HRD
TCGA-36-2539-01	24	28	24	76	HRD
TCGA-36-2540-01	2	1	4	7	non-HRD
TCGA-36-2542-01	19	17	14	50	HRD
TCGA-36-2543-01	25	21	18	64	HRD
TCGA-36-2544-01	25	27	15	67	HRD
TCGA-36-2545-01	25	31	17	73	HRD
TCGA-36-2547-01	37	36	18	91	HRD
TCGA-36-2548-01	14	8	4	26	non-HRD
TCGA-36-2549-01	21	25	12	58	HRD
TCGA-36-2551-01	24	22	8	54	HRD
TCGA-36-2552-01	23	15	8	46	HRD
TCGA-37-3783-01	17	15	10	42	HRD
TCGA-37-3789-01	22	8	13	43	HRD
TCGA-37-3792-01	12	7	7	26	non-HRD
TCGA-37-4129-01	0	0	0	0	non-HRD
TCGA-37-4130-01	25	22	16	63	HRD
TCGA-37-4132-01	7	2	9	18	non-HRD
TCGA-37-4133-01	19	8	7	34	non-HRD
TCGA-37-4135-01	21	13	14	48	HRD
TCGA-37-4141-01	9	6	7	22	non-HRD
TCGA-37-5819-01	27	23	13	63	HRD
TCGA-37-A5EL-01	20	27	16	63	HRD
TCGA-37-A5EN-01	16	10	10	36	non-HRD
TCGA-38-4625-01	19	12	9	40	non-HRD
TCGA-38-4626-01	4	4	0	8	non-HRD
TCGA-38-4627-01	1	2	1	4	non-HRD
TCGA-38-4628-01	23	13	10	46	HRD
TCGA-38-4629-01	14	6	12	32	non-HRD
TCGA-38-4630-01	13	11	16	40	non-HRD
TCGA-38-4631-01	14	17	11	42	HRD
TCGA-38-4632-01	19	15	6	40	non-HRD
TCGA-38-6178-01	15	10	5	30	non-HRD
TCGA-38-7271-01	1	1	0	2	non-HRD
TCGA-38-A44F-01	0	0	0	0	non-HRD
TCGA-39-5011-01	18	13	24	55	HRD
TCGA-39-5016-01	17	20	7	44	HRD
TCGA-39-5019-01	9	6	8	23	non-HRD
TCGA-39-5021-01	12	3	9	24	non-HRD
TCGA-39-5022-01	6	6	3	15	non-HRD
TCGA-39-5024-01	11	8	7	26	non-HRD
TCGA-39-5027-01	15	5	15	35	non-HRD
TCGA-39-5028-01	10	9	2	21	non-HRD
TCGA-39-5029-01	17	13	13	43	HRD
TCGA-39-5030-01	6	0	6	12	non-HRD
TCGA-39-5031-01	17	15	13	45	HRD
TCGA-39-5034-01	19	6	12	37	non-HRD
TCGA-39-5035-01	13	9	4	26	non-HRD
TCGA-39-5036-01	9	6	9	24	non-HRD
TCGA-39-5037-01	25	27	3	55	HRD
TCGA-39-5039-01	3	1	5	9	non-HRD
TCGA-39-5040-01	15	9	7	31	non-HRD
TCGA-3A-A9I5-01	10	7	8	25	non-HRD
TCGA-3A-A9I7-01	2	3	0	5	non-HRD
TCGA-3A-A9I9-01	15	14	14	43	HRD
TCGA-3A-A9IB-01	12	11	9	32	non-HRD
TCGA-3A-A9IC-01	13	5	10	28	non-HRD
TCGA-3A-A9IH-01	3	0	8	11	non-HRD
TCGA-3A-A9IJ-01	0	0	0	0	non-HRD
TCGA-3A-A9IL-01	0	0	1	1	non-HRD
TCGA-3A-A9IN-01	1	1	1	3	non-HRD
TCGA-3A-A9IO-01	0	0	0	0	non-HRD
TCGA-3A-A9IR-01	2	3	3	8	non-HRD
TCGA-3A-A9IS-01	1	0	2	3	non-HRD
TCGA-3A-A9IU-01	7	1	5	13	non-HRD
TCGA-3A-A9IV-01	7	2	2	11	non-HRD
TCGA-3A-A9IX-01	1	2	0	3	non-HRD
TCGA-3A-A9IZ-01	9	13	10	32	non-HRD
TCGA-3A-A9J0-01	9	5	8	22	non-HRD
TCGA-3B-A9HI-01	20	19	11	50	HRD
TCGA-3B-A9HJ-01	0	0	0	0	non-HRD
TCGA-3B-A9HL-01	15	11	2	28	non-HRD
TCGA-3B-A9HO-01	6	2	4	12	non-HRD
TCGA-3B-A9HP-01	6	2	3	11	non-HRD
TCGA-3B-A9HQ-01	4	6	5	15	non-HRD
TCGA-3B-A9HR-01	17	12	8	37	non-HRD
TCGA-3B-A9HS-01	17	19	8	44	HRD
TCGA-3B-A9HT-01	0	0	0	0	non-HRD
TCGA-3B-A9HU-01	8	3	9	20	non-HRD
TCGA-3B-A9HV-01	9	10	5	24	non-HRD
TCGA-3B-A9HX-01	11	9	11	31	non-HRD
TCGA-3B-A9HY-01	8	1	6	15	non-HRD
TCGA-3B-A9HZ-01	7	3	6	16	non-HRD
TCGA-3B-A9I0-01	7	5	5	17	non-HRD
TCGA-3B-A9I1-01	9	5	5	19	non-HRD
TCGA-3B-A9I3-01	11	9	14	34	non-HRD
TCGA-3C-AAAU-01	6	5	4	15	non-HRD
TCGA-3C-AALI-01	12	12	8	32	non-HRD
TCGA-3C-AALJ-01	14	11	6	31	non-HRD
TCGA-3C-AALK-01	3	1	3	7	non-HRD
TCGA-3E-AAAZ-01	2	1	2	5	non-HRD
TCGA-3G-AB0O-01	0	0	0	0	non-HRD
TCGA-3G-AB0Q-01	0	2	1	3	non-HRD
TCGA-3G-AB0T-01	2	1	1	4	non-HRD
TCGA-3G-AB14-01	0	1	2	3	non-HRD
TCGA-3G-AB19-01	0	0	0	0	non-HRD
TCGA-3H-AB3K-01	6	3	5	14	non-HRD
TCGA-3H-AB3L-01	14	5	13	32	non-HRD
TCGA-3H-AB3M-01	8	14	16	38	non-HRD
TCGA-3H-AB3S-01	2	6	4	12	non-HRD
TCGA-3H-AB3T-01	4	7	8	19	non-HRD
TCGA-3H-AB3U-01	3	3	1	7	non-HRD
TCGA-3H-AB3X-01	11	5	8	24	non-HRD
TCGA-3K-AAZ8-01	5	1	1	7	non-HRD
TCGA-3L-AA1B-01	0	1	0	1	non-HRD
TCGA-3M-AB46-01	15	18	18	51	HRD
TCGA-3M-AB47-01	1	1	2	4	non-HRD
TCGA-3N-A9WB-06	5	4	3	12	non-HRD
TCGA-3N-A9WC-06	16	11	14	41	non-HRD
TCGA-3N-A9WD-06	1	3	1	5	non-HRD
TCGA-3P-A9WA-01	15	17	9	41	non-HRD
TCGA-3Q-A9WF-01	0	0	0	0	non-HRD
TCGA-3R-A8YX-01	21	21	9	51	HRD
TCGA-3S-A8YW-01	5	2	2	9	non-HRD
TCGA-3U-A98D-01	8	12	14	34	non-HRD
TCGA-3U-A98E-01	2	4	2	8	non-HRD
TCGA-3U-A98F-01	4	2	2	8	non-HRD
TCGA-3U-A98G-01	0	0	0	0	non-HRD
TCGA-3U-A98H-01	0	3	1	4	non-HRD
TCGA-3U-A98I-01	9	7	7	23	non-HRD
TCGA-3U-A98J-01	4	4	5	13	non-HRD
TCGA-3X-AAV9-01	10	8	12	30	non-HRD
TCGA-3X-AAVA-01	3	1	4	8	non-HRD
TCGA-3X-AAVB-01	8	5	10	23	non-HRD
TCGA-3X-AAVC-01	16	6	13	35	non-HRD
TCGA-3X-AAVE-01	5	2	7	14	non-HRD
TCGA-3Z-A93Z-01	1	2	2	5	non-HRD
TCGA-41-2571-01	2	5	4	11	non-HRD
TCGA-41-2572-01	3	3	5	11	non-HRD
TCGA-41-2573-01	3	2	1	6	non-HRD
TCGA-41-2575-01	9	10	6	25	non-HRD
TCGA-41-3392-01	5	6	7	18	non-HRD
TCGA-41-3393-01	1	2	2	5	non-HRD
TCGA-41-3915-01	2	1	3	6	non-HRD
TCGA-41-4097-01	2	2	1	5	non-HRD
TCGA-41-5651-01	8	5	3	16	non-HRD
TCGA-41-6646-01	0	4	0	4	non-HRD
TCGA-42-2582-01	18	26	6	50	HRD
TCGA-42-2587-01	31	38	11	80	HRD
TCGA-42-2588-01	23	16	8	47	HRD
TCGA-42-2589-01	29	24	17	70	HRD
TCGA-42-2590-01	18	24	12	54	HRD
TCGA-42-2591-01	26	34	26	86	HRD
TCGA-42-2593-01	17	14	7	38	non-HRD
TCGA-43-2576-01	17	11	11	39	non-HRD
TCGA-43-2578-01	21	18	14	53	HRD
TCGA-43-2581-01	11	2	4	17	non-HRD
TCGA-43-3394-01	20	11	8	39	non-HRD
TCGA-43-3920-01	17	9	9	35	non-HRD
TCGA-43-5668-01	23	8	13	44	HRD
TCGA-43-5670-01	17	9	6	32	non-HRD
TCGA-43-6143-01	18	14	11	43	HRD
TCGA-43-6647-01	7	7	5	19	non-HRD
TCGA-43-6770-01	27	28	14	69	HRD
TCGA-43-6771-01	6	3	4	13	non-HRD
TCGA-43-6773-01	1	3	1	5	non-HRD
TCGA-43-7656-01	13	9	9	31	non-HRD
TCGA-43-7657-01	16	9	15	40	non-HRD
TCGA-43-7658-01	19	12	11	42	HRD
TCGA-43-8115-01	11	14	10	35	non-HRD
TCGA-43-8116-01	17	14	12	43	HRD
TCGA-43-8118-01	23	20	15	58	HRD
TCGA-43-A474-01	21	11	11	43	HRD
TCGA-43-A475-01	16	14	15	45	HRD
TCGA-43-A56U-01	10	15	11	36	non-HRD
TCGA-43-A56V-01	14	5	13	32	non-HRD
TCGA-44-2655-01	3	2	0	5	non-HRD
TCGA-44-2656-01	18	18	15	51	HRD
TCGA-44-2657-01	10	7	11	28	non-HRD
TCGA-44-2659-01	8	2	7	17	non-HRD
TCGA-44-2661-01	3	4	3	10	non-HRD
TCGA-44-2662-01	16	5	13	34	non-HRD
TCGA-44-2665-01	9	7	6	22	non-HRD
TCGA-44-2666-01	1	4	3	8	non-HRD
TCGA-44-2668-01	10	13	10	33	non-HRD
TCGA-44-3396-01	5	2	3	10	non-HRD
TCGA-44-3398-01	1	2	0	3	non-HRD
TCGA-44-3917-01	16	11	21	48	HRD
TCGA-44-3918-01	18	22	18	58	HRD
TCGA-44-3919-01	6	5	5	16	non-HRD
TCGA-44-4112-01	2	9	9	20	non-HRD
TCGA-44-5643-01	13	4	7	24	non-HRD
TCGA-44-5644-01	25	28	20	73	HRD
TCGA-44-5645-01	4	4	2	10	non-HRD
TCGA-44-6144-01	9	3	4	16	non-HRD
TCGA-44-6145-01	3	2	3	8	non-HRD
TCGA-44-6146-01	4	2	5	11	non-HRD
TCGA-44-6147-01	4	2	3	9	non-HRD
TCGA-44-6148-01	0	0	0	0	non-HRD
TCGA-44-6774-01	4	6	4	14	non-HRD
TCGA-44-6775-01	13	6	8	27	non-HRD
TCGA-44-6776-01	5	5	4	14	non-HRD
TCGA-44-6777-01	7	1	4	12	non-HRD
TCGA-44-6778-01	20	10	8	38	non-HRD
TCGA-44-6779-01	12	10	11	33	non-HRD
TCGA-44-7659-01	6	3	3	12	non-HRD
TCGA-44-7660-01	15	11	15	41	non-HRD
TCGA-44-7661-01	3	2	1	6	non-HRD
TCGA-44-7662-01	16	10	13	39	non-HRD
TCGA-44-7667-01	14	16	6	36	non-HRD
TCGA-44-7669-01	16	11	10	37	non-HRD
TCGA-44-7670-01	24	15	14	53	HRD
TCGA-44-7671-01	5	3	4	12	non-HRD
TCGA-44-7672-01	13	8	7	28	non-HRD
TCGA-44-8117-01	18	11	9	38	non-HRD
TCGA-44-8119-01	14	12	9	35	non-HRD
TCGA-44-8120-01	9	3	10	22	non-HRD
TCGA-44-A479-01	11	11	9	31	non-HRD
TCGA-44-A47A-01	7	7	2	16	non-HRD
TCGA-44-A47B-01	7	4	3	14	non-HRD
TCGA-44-A47F-01	11	4	2	17	non-HRD
TCGA-44-A47G-01	5	14	2	21	non-HRD
TCGA-44-A4SS-01	13	23	8	44	HRD
TCGA-44-A4SU-01	8	8	13	29	non-HRD
TCGA-46-3765-01	20	12	12	44	HRD
TCGA-46-3766-01	6	5	5	16	non-HRD
TCGA-46-3767-01	9	10	3	22	non-HRD
TCGA-46-3768-01	13	6	11	30	non-HRD
TCGA-46-3769-01	32	30	17	79	HRD
TCGA-46-6025-01	23	33	17	73	HRD
TCGA-46-6026-01	13	11	7	31	non-HRD
TCGA-49-4486-01	5	2	2	9	non-HRD
TCGA-49-4487-01	17	9	3	29	non-HRD
TCGA-49-4488-01	30	13	16	59	HRD
TCGA-49-4490-01	14	8	6	28	non-HRD
TCGA-49-4494-01	3	6	6	15	non-HRD
TCGA-49-4501-01	12	9	7	28	non-HRD
TCGA-49-4505-01	13	12	5	30	non-HRD
TCGA-49-4506-01	4	1	4	9	non-HRD
TCGA-49-4507-01	16	13	13	42	HRD
TCGA-49-4510-01	8	6	7	21	non-HRD
TCGA-49-4512-01	12	9	4	25	non-HRD
TCGA-49-4514-01	11	13	7	31	non-HRD
TCGA-49-6742-01	4	2	3	9	non-HRD
TCGA-49-6743-01	12	10	11	33	non-HRD
TCGA-49-6744-01	9	8	9	26	non-HRD
TCGA-49-6745-01	4	3	4	11	non-HRD
TCGA-49-6761-01	9	7	8	24	non-HRD
TCGA-49-6767-01	11	9	10	30	non-HRD
TCGA-49-AAQV-01	15	10	12	37	non-HRD
TCGA-49-AAR0-01	10	9	19	38	non-HRD
TCGA-49-AAR2-01	6	3	10	19	non-HRD
TCGA-49-AAR3-01	4	7	10	21	non-HRD
TCGA-49-AAR4-01	7	4	10	21	non-HRD
TCGA-49-AAR9-01	21	15	16	52	HRD
TCGA-49-AARE-01	15	11	9	35	non-HRD
TCGA-49-AARN-01	6	4	10	20	non-HRD
TCGA-49-AARO-01	16	11	10	37	non-HRD
TCGA-49-AARQ-01	19	13	7	39	non-HRD
TCGA-49-AARR-01	0	0	0	0	non-HRD
TCGA-4A-A93W-01	0	0	0	0	non-HRD
TCGA-4A-A93X-01	0	0	0	0	non-HRD
TCGA-4B-A93V-01	15	11	10	36	non-HRD
TCGA-4C-A93U-01	2	2	2	6	non-HRD
TCGA-4E-A92E-01	1	0	0	1	non-HRD
TCGA-4G-AAZO-01	8	13	5	26	non-HRD
TCGA-4G-AAZT-01	5	1	5	11	non-HRD
TCGA-4H-AAAK-01	6	6	4	16	non-HRD
TCGA-4J-AA1J-01	10	7	11	28	non-HRD
TCGA-4K-AA1G-01	8	9	3	20	non-HRD
TCGA-4K-AA1H-01	2	0	4	6	non-HRD
TCGA-4K-AA1I-01	10	6	3	19	non-HRD
TCGA-4K-AAAL-01	6	6	0	12	non-HRD
TCGA-4L-AA1F-01	14	18	5	37	non-HRD
TCGA-4N-A93T-01	5	4	4	13	non-HRD
TCGA-4P-AA8J-01	8	8	9	25	non-HRD
TCGA-4R-AA8I-01	4	7	5	16	non-HRD
TCGA-4T-AA8H-01	2	1	0	3	non-HRD
TCGA-4V-A9QI-01	0	0	0	0	non-HRD
TCGA-4V-A9QJ-01	3	1	0	4	non-HRD
TCGA-4V-A9QL-01	0	1	0	1	non-HRD
TCGA-4V-A9QM-01	0	1	0	1	non-HRD
TCGA-4V-A9QN-01	3	2	3	8	non-HRD
TCGA-4V-A9QR-01	2	2	0	4	non-HRD
TCGA-4V-A9QS-01	8	13	1	22	non-HRD
TCGA-4V-A9QT-01	0	0	0	0	non-HRD
TCGA-4V-A9QU-01	0	0	0	0	non-HRD
TCGA-4V-A9QW-01	0	0	0	0	non-HRD
TCGA-4V-A9QX-01	2	1	2	5	non-HRD
TCGA-4W-AA9R-01	3	1	4	8	non-HRD
TCGA-4W-AA9S-01	3	3	1	7	non-HRD
TCGA-4W-AA9T-01	2	2	2	6	non-HRD
TCGA-4X-A9FA-01	0	0	0	0	non-HRD
TCGA-4X-A9FD-01	2	2	1	5	non-HRD
TCGA-4Z-AA7M-01	21	17	8	46	HRD
TCGA-4Z-AA7O-01	6	3	3	12	non-HRD
TCGA-4Z-AA7Q-01	13	13	15	41	non-HRD
TCGA-4Z-AA7R-01	19	22	10	51	HRD
TCGA-4Z-AA7S-01	6	3	1	10	non-HRD
TCGA-4Z-AA7W-01	18	22	15	55	HRD
TCGA-4Z-AA7Y-01	3	3	1	7	non-HRD
TCGA-4Z-AA80-01	31	23	10	64	HRD
TCGA-4Z-AA81-01	11	5	2	18	non-HRD
TCGA-4Z-AA82-01	9	12	2	23	non-HRD
TCGA-4Z-AA83-01	1	1	1	3	non-HRD
TCGA-4Z-AA84-01	26	27	15	68	HRD
TCGA-4Z-AA86-01	18	13	13	44	HRD
TCGA-4Z-AA87-01	22	24	8	54	HRD
TCGA-4Z-AA89-01	3	5	2	10	non-HRD
TCGA-50-5044-01	2	2	2	6	non-HRD
TCGA-50-5045-01	5	4	2	11	non-HRD
TCGA-50-5049-01	11	7	8	26	non-HRD
TCGA-50-5051-01	3	3	1	7	non-HRD
TCGA-50-5055-01	1	0	1	2	non-HRD
TCGA-50-5066-01	6	5	3	14	non-HRD
TCGA-50-5066-02	21	18	14	53	HRD
TCGA-50-5068-01	6	3	5	14	non-HRD
TCGA-50-5072-01	7	5	4	16	non-HRD
TCGA-50-5930-01	9	2	13	24	non-HRD
TCGA-50-5931-01	9	2	7	18	non-HRD
TCGA-50-5932-01	10	7	8	25	non-HRD
TCGA-50-5933-01	12	7	6	25	non-HRD
TCGA-50-5935-01	8	3	2	13	non-HRD
TCGA-50-5936-01	8	8	11	27	non-HRD
TCGA-50-5939-01	12	10	13	35	non-HRD
TCGA-50-5941-01	15	10	4	29	non-HRD
TCGA-50-5942-01	2	0	2	4	non-HRD
TCGA-50-5944-01	13	8	2	23	non-HRD
TCGA-50-5946-01	15	8	9	32	non-HRD
TCGA-50-5946-02	17	15	8	40	non-HRD
TCGA-50-6590-01	11	9	7	27	non-HRD
TCGA-50-6591-01	14	8	7	29	non-HRD
TCGA-50-6592-01	12	12	9	33	non-HRD
TCGA-50-6593-01	13	8	7	28	non-HRD
TCGA-50-6594-01	20	12	15	47	HRD
TCGA-50-6595-01	5	3	4	12	non-HRD
TCGA-50-6597-01	8	6	8	22	non-HRD
TCGA-50-6673-01	8	4	4	16	non-HRD
TCGA-50-7109-01	14	13	3	30	non-HRD
TCGA-50-8457-01	4	2	3	9	non-HRD
TCGA-50-8459-01	1	3	3	7	non-HRD
TCGA-50-8460-01	4	3	1	8	non-HRD
TCGA-51-4079-01	12	12	12	36	non-HRD
TCGA-51-4080-01	7	7	7	21	non-HRD
TCGA-51-4081-01	16	6	10	32	non-HRD
TCGA-52-7622-01	10	5	9	24	non-HRD
TCGA-52-7809-01	21	19	12	52	HRD
TCGA-52-7810-01	26	20	18	64	HRD
TCGA-52-7811-01	12	7	5	24	non-HRD
TCGA-52-7812-01	13	11	12	36	non-HRD
TCGA-53-7624-01	24	25	17	66	HRD
TCGA-53-7626-01	12	6	8	26	non-HRD
TCGA-53-7813-01	9	10	5	24	non-HRD
TCGA-53-A4EZ-01	18	9	17	44	HRD
TCGA-55-1592-01	16	19	8	43	HRD
TCGA-55-1594-01	16	7	10	33	non-HRD
TCGA-55-1595-01	15	16	3	34	non-HRD
TCGA-55-1596-01	12	6	6	24	non-HRD
TCGA-55-5899-01	19	10	16	45	HRD
TCGA-55-6543-01	2	1	1	4	non-HRD
TCGA-55-6642-01	13	14	7	34	non-HRD
TCGA-55-6712-01	10	11	6	27	non-HRD
TCGA-55-6968-01	13	11	10	34	non-HRD
TCGA-55-6969-01	13	15	10	38	non-HRD
TCGA-55-6970-01	7	4	5	16	non-HRD
TCGA-55-6971-01	7	8	3	18	non-HRD
TCGA-55-6972-01	8	7	6	21	non-HRD
TCGA-55-6975-01	8	6	10	24	non-HRD
TCGA-55-6978-01	5	2	2	9	non-HRD
TCGA-55-6979-01	4	4	3	11	non-HRD
TCGA-55-6980-01	4	1	2	7	non-HRD
TCGA-55-6981-01	10	7	4	21	non-HRD
TCGA-55-6982-01	6	4	9	19	non-HRD
TCGA-55-6983-01	1	1	0	2	non-HRD
TCGA-55-6984-01	7	2	3	12	non-HRD
TCGA-55-6985-01	8	9	7	24	non-HRD
TCGA-55-6986-01	2	4	3	9	non-HRD
TCGA-55-6987-01	5	7	5	17	non-HRD
TCGA-55-7281-01	6	1	5	12	non-HRD
TCGA-55-7283-01	10	10	3	23	non-HRD
TCGA-55-7284-01	5	4	2	11	non-HRD
TCGA-55-7570-01	12	3	9	24	non-HRD
TCGA-55-7573-01	13	9	7	29	non-HRD
TCGA-55-7574-01	5	2	8	15	non-HRD
TCGA-55-7576-01	22	21	10	53	HRD
TCGA-55-7724-01	6	5	5	16	non-HRD
TCGA-55-7725-01	7	4	4	15	non-HRD
TCGA-55-7726-01	14	3	7	24	non-HRD
TCGA-55-7727-01	8	9	7	24	non-HRD
TCGA-55-7728-01	3	4	4	11	non-HRD
TCGA-55-7815-01	9	10	4	23	non-HRD
TCGA-55-7903-01	10	5	8	23	non-HRD
TCGA-55-7907-01	15	10	7	32	non-HRD
TCGA-55-7910-01	16	17	9	42	HRD
TCGA-55-7911-01	7	3	2	12	non-HRD
TCGA-55-7913-01	11	11	10	32	non-HRD
TCGA-55-7914-01	9	8	9	26	non-HRD
TCGA-55-7994-01	25	14	12	51	HRD
TCGA-55-7995-01	19	16	15	50	HRD
TCGA-55-8085-01	11	8	6	25	non-HRD
TCGA-55-8087-01	5	2	2	9	non-HRD
TCGA-55-8089-01	10	7	7	24	non-HRD
TCGA-55-8090-01	4	4	1	9	non-HRD
TCGA-55-8091-01	5	4	5	14	non-HRD
TCGA-55-8092-01	18	13	7	38	non-HRD
TCGA-55-8094-01	17	12	8	37	non-HRD
TCGA-55-8096-01	10	7	7	24	non-HRD
TCGA-55-8097-01	3	0	2	5	non-HRD
TCGA-55-8203-01	7	4	4	15	non-HRD
TCGA-55-8204-01	9	3	10	22	non-HRD
TCGA-55-8205-01	9	1	6	16	non-HRD
TCGA-55-8206-01	2	1	1	4	non-HRD
TCGA-55-8207-01	10	8	5	23	non-HRD
TCGA-55-8208-01	6	8	4	18	non-HRD
TCGA-55-8301-01	9	6	7	22	non-HRD
TCGA-55-8302-01	8	5	6	19	non-HRD
TCGA-55-8505-01	2	6	5	13	non-HRD
TCGA-55-8506-01	19	9	9	37	non-HRD
TCGA-55-8507-01	17	19	10	46	HRD
TCGA-55-8508-01	18	11	7	36	non-HRD
TCGA-55-8510-01	19	11	12	42	HRD
TCGA-55-8511-01	27	22	15	64	HRD
TCGA-55-8512-01	5	3	8	16	non-HRD
TCGA-55-8513-01	0	0	0	0	non-HRD
TCGA-55-8514-01	17	13	10	40	non-HRD
TCGA-55-8614-01	13	7	10	30	non-HRD
TCGA-55-8615-01	28	19	9	56	HRD
TCGA-55-8616-01	16	6	9	31	non-HRD
TCGA-55-8619-01	0	3	0	3	non-HRD
TCGA-55-8620-01	13	10	12	35	non-HRD
TCGA-55-8621-01	4	1	3	8	non-HRD
TCGA-55-A48X-01	7	5	7	19	non-HRD
TCGA-55-A48Y-01	11	6	6	23	non-HRD
TCGA-55-A48Z-01	13	9	7	29	non-HRD
TCGA-55-A490-01	22	19	13	54	HRD
TCGA-55-A491-01	16	12	11	39	non-HRD
TCGA-55-A492-01	5	5	1	11	non-HRD
TCGA-55-A493-01	8	9	6	23	non-HRD
TCGA-55-A494-01	8	11	3	22	non-HRD
TCGA-55-A4DF-01	20	14	10	44	HRD
TCGA-55-A4DG-01	17	10	11	38	non-HRD
TCGA-55-A57B-01	5	8	8	21	non-HRD
TCGA-56-1622-01	17	11	18	46	HRD
TCGA-56-5897-01	5	7	6	18	non-HRD
TCGA-56-5898-01	10	8	8	26	non-HRD
TCGA-56-6545-01	20	13	13	46	HRD
TCGA-56-6546-01	6	4	4	14	non-HRD
TCGA-56-7221-01	8	5	10	23	non-HRD
TCGA-56-7222-01	17	6	7	30	non-HRD
TCGA-56-7223-01	16	13	9	38	non-HRD
TCGA-56-7579-01	18	15	16	49	HRD
TCGA-56-7580-01	7	0	8	15	non-HRD
TCGA-56-7582-01	13	10	9	32	non-HRD
TCGA-56-7730-01	19	10	9	38	non-HRD
TCGA-56-7731-01	3	0	1	4	non-HRD
TCGA-56-7822-01	17	8	9	34	non-HRD
TCGA-56-7823-01	14	7	9	30	non-HRD
TCGA-56-8082-01	11	9	14	34	non-HRD
TCGA-56-8083-01	13	10	13	36	non-HRD
TCGA-56-8201-01	12	2	8	22	non-HRD
TCGA-56-8304-01	13	9	15	37	non-HRD
TCGA-56-8305-01	15	8	9	32	non-HRD
TCGA-56-8307-01	7	6	7	20	non-HRD
TCGA-56-8308-01	17	15	6	38	non-HRD
TCGA-56-8309-01	8	3	9	20	non-HRD
TCGA-56-8503-01	11	15	21	47	HRD
TCGA-56-8504-01	20	6	9	35	non-HRD
TCGA-56-8622-01	9	7	6	22	non-HRD
TCGA-56-8623-01	0	0	0	0	non-HRD
TCGA-56-8624-01	7	7	5	19	non-HRD
TCGA-56-8625-01	12	17	17	46	HRD
TCGA-56-8626-01	11	7	11	29	non-HRD
TCGA-56-8628-01	10	3	11	24	non-HRD
TCGA-56-8629-01	21	17	17	55	HRD
TCGA-56-A49D-01	19	11	22	52	HRD
TCGA-56-A4BW-01	21	7	13	41	non-HRD
TCGA-56-A4BX-01	14	9	8	31	non-HRD
TCGA-56-A4BY-01	13	13	8	34	non-HRD
TCGA-56-A4ZJ-01	11	7	9	27	non-HRD
TCGA-56-A5DS-01	7	3	6	16	non-HRD
TCGA-56-A62T-01	13	5	4	22	non-HRD
TCGA-57-1582-01	31	30	11	72	HRD
TCGA-57-1583-01	18	14	7	39	non-HRD
TCGA-57-1584-01	15	17	7	39	non-HRD
TCGA-57-1585-01	27	38	9	74	HRD
TCGA-57-1586-01	18	11	12	41	non-HRD
TCGA-57-1992-01	15	9	16	40	non-HRD
TCGA-57-1993-01	18	9	1	28	non-HRD
TCGA-57-1994-01	18	21	10	49	HRD
TCGA-58-8386-01	20	13	15	48	HRD
TCGA-58-8387-01	16	12	15	43	HRD
TCGA-58-8388-01	6	3	12	21	non-HRD
TCGA-58-8390-01	12	8	14	34	non-HRD
TCGA-58-8391-01	18	23	15	56	HRD
TCGA-58-8393-01	10	5	6	21	non-HRD
TCGA-58-A46J-01	9	4	0	13	non-HRD
TCGA-58-A46K-01	16	9	16	41	non-HRD
TCGA-58-A46L-01	20	15	22	57	HRD
TCGA-58-A46M-01	30	19	23	72	HRD
TCGA-58-A46N-01	12	6	12	30	non-HRD
TCGA-59-2348-01	17	35	9	61	HRD
TCGA-59-2350-01	8	3	4	15	non-HRD
TCGA-59-2351-01	22	23	13	58	HRD
TCGA-59-2352-01	20	17	4	41	non-HRD
TCGA-59-2354-01	17	22	14	53	HRD
TCGA-59-2355-01	14	7	9	30	non-HRD
TCGA-59-2363-01	22	21	12	55	HRD
TCGA-59-2372-01	17	19	8	44	HRD
TCGA-59-A5PD-01	33	35	18	86	HRD
TCGA-5B-A90C-01	16	13	13	42	HRD
TCGA-5C-A9VG-01	3	7	3	13	non-HRD
TCGA-5C-A9VH-01	5	2	5	12	non-HRD
TCGA-5C-AAPD-01	12	6	10	28	non-HRD
TCGA-5G-A9ZZ-01	3	1	3	7	non-HRD
TCGA-5K-AAAP-01	2	2	0	4	non-HRD
TCGA-5L-AAT0-01	3	3	3	9	non-HRD
TCGA-5M-AAT4-01	13	11	9	33	non-HRD
TCGA-5M-AAT5-01	5	6	8	19	non-HRD
TCGA-5M-AAT6-01	1	1	2	4	non-HRD
TCGA-5M-AATA-01	14	5	5	24	non-HRD
TCGA-5M-AATE-01	12	14	3	29	non-HRD
TCGA-5N-A9KI-01	14	11	6	31	non-HRD
TCGA-5N-A9KM-01	13	9	12	34	non-HRD
TCGA-5P-A9JU-01	2	2	3	7	non-HRD
TCGA-5P-A9JV-01	0	0	0	0	non-HRD
TCGA-5P-A9JW-01	0	0	0	0	non-HRD
TCGA-5P-A9JY-01	0	0	0	0	non-HRD
TCGA-5P-A9JZ-01	0	0	0	0	non-HRD
TCGA-5P-A9K0-01	0	0	0	0	non-HRD
TCGA-5P-A9K2-01	0	0	0	0	non-HRD
TCGA-5P-A9K3-01	3	5	8	16	non-HRD
TCGA-5P-A9K4-01	2	1	0	3	non-HRD
TCGA-5P-A9K6-01	0	0	0	0	non-HRD
TCGA-5P-A9K8-01	1	1	2	4	non-HRD
TCGA-5P-A9K9-01	8	6	6	20	non-HRD
TCGA-5P-A9KA-01	0	0	0	0	non-HRD
TCGA-5P-A9KC-01	3	1	2	6	non-HRD
TCGA-5P-A9KE-01	0	0	0	0	non-HRD
TCGA-5P-A9KH-01	0	0	0	0	non-HRD
TCGA-5R-AA1C-01	4	1	2	7	non-HRD
TCGA-5R-AA1D-01	1	0	0	1	non-HRD
TCGA-5R-AAAM-01	4	3	5	12	non-HRD
TCGA-5S-A9Q8-01	2	2	1	5	non-HRD
TCGA-5T-A9QA-01	7	2	6	15	non-HRD
TCGA-5U-AB0D-01	13	4	5	22	non-HRD
TCGA-5U-AB0E-01	4	4	2	10	non-HRD
TCGA-5U-AB0F-01	2	0	2	4	non-HRD
TCGA-5V-A9RR-01	0	2	1	3	non-HRD
TCGA-5X-AA5U-01	18	10	6	34	non-HRD
TCGA-60-2695-01	11	7	4	22	non-HRD
TCGA-60-2696-01	9	2	1	12	non-HRD
TCGA-60-2697-01	0	0	0	0	non-HRD
TCGA-60-2698-01	27	16	16	59	HRD
TCGA-60-2703-01	15	4	9	28	non-HRD
TCGA-60-2704-01	11	2	5	18	non-HRD
TCGA-60-2706-01	20	15	10	45	HRD
TCGA-60-2707-01	7	3	6	16	non-HRD
TCGA-60-2708-01	11	3	5	19	non-HRD
TCGA-60-2709-01	11	8	5	24	non-HRD
TCGA-60-2710-01	12	6	11	29	non-HRD
TCGA-60-2711-01	19	16	6	41	non-HRD
TCGA-60-2712-01	12	9	6	27	non-HRD
TCGA-60-2713-01	19	7	19	45	HRD
TCGA-60-2714-01	22	12	14	48	HRD
TCGA-60-2715-01	8	6	14	28	non-HRD
TCGA-60-2716-01	0	0	0	0	non-HRD
TCGA-60-2719-01	13	5	12	30	non-HRD
TCGA-60-2720-01	7	7	5	19	non-HRD
TCGA-60-2721-01	11	6	7	24	non-HRD
TCGA-60-2722-01	16	6	9	31	non-HRD
TCGA-60-2723-01	16	11	15	42	HRD
TCGA-60-2724-01	11	3	7	21	non-HRD
TCGA-60-2725-01	10	2	14	26	non-HRD
TCGA-60-2726-01	16	7	11	34	non-HRD
TCGA-61-1722-01	16	14	14	44	HRD
TCGA-61-1724-01	27	23	23	73	HRD
TCGA-61-1725-01	17	21	18	56	HRD
TCGA-61-1727-01	28	34	14	76	HRD
TCGA-61-1728-01	13	16	4	33	non-HRD
TCGA-61-1730-01	10	5	2	17	non-HRD
TCGA-61-1733-01	10	4	3	17	non-HRD
TCGA-61-1734-01	20	22	12	54	HRD
TCGA-61-1736-01	11	8	4	23	non-HRD
TCGA-61-1737-01	19	29	16	64	HRD
TCGA-61-1738-01	13	10	8	31	non-HRD
TCGA-61-1740-01	26	32	22	80	HRD
TCGA-61-1741-01	18	12	3	33	non-HRD
TCGA-61-1743-01	17	12	5	34	non-HRD
TCGA-61-1895-01	25	34	21	80	HRD
TCGA-61-1899-01	22	9	3	34	non-HRD
TCGA-61-1900-01	28	35	21	84	HRD
TCGA-61-1901-01	17	20	13	50	HRD
TCGA-61-1903-01	24	23	12	59	HRD
TCGA-61-1904-01	14	10	2	26	non-HRD
TCGA-61-1906-01	12	13	5	30	non-HRD
TCGA-61-1907-01	26	29	9	64	HRD
TCGA-61-1910-01	21	24	13	58	HRD
TCGA-61-1911-01	10	14	5	29	non-HRD
TCGA-61-1913-01	20	22	16	58	HRD
TCGA-61-1914-01	20	17	14	51	HRD
TCGA-61-1915-01	21	27	6	54	HRD
TCGA-61-1917-01	29	41	23	93	HRD
TCGA-61-1918-01	19	17	5	41	non-HRD
TCGA-61-1919-01	18	19	6	43	HRD
TCGA-61-1995-01	0	1	0	1	non-HRD
TCGA-61-1998-01	17	19	8	44	HRD
TCGA-61-2000-01	19	14	10	43	HRD
TCGA-61-2002-01	26	27	18	71	HRD
TCGA-61-2003-01	10	13	2	25	non-HRD
TCGA-61-2008-01	21	39	8	68	HRD
TCGA-61-2009-01	8	6	3	17	non-HRD
TCGA-61-2012-01	20	10	5	35	non-HRD
TCGA-61-2016-01	11	12	11	34	non-HRD
TCGA-61-2017-01	3	1	2	6	non-HRD
TCGA-61-2018-01	30	35	16	81	HRD
TCGA-61-2087-01	18	21	17	56	HRD
TCGA-61-2088-01	8	5	3	16	non-HRD
TCGA-61-2092-01	3	3	3	9	non-HRD
TCGA-61-2094-01	9	10	9	28	non-HRD
TCGA-61-2095-01	3	1	2	6	non-HRD
TCGA-61-2096-01	20	20	16	56	HRD
TCGA-61-2097-01	20	22	13	55	HRD
TCGA-61-2098-01	20	12	6	38	non-HRD
TCGA-61-2101-01	11	5	4	20	non-HRD
TCGA-61-2102-01	18	10	6	34	non-HRD
TCGA-61-2104-01	24	32	9	65	HRD
TCGA-61-2109-01	22	27	15	64	HRD
TCGA-61-2110-01	5	4	1	10	non-HRD
TCGA-61-2113-01	13	11	4	28	non-HRD
TCGA-61-2610-02	25	35	20	80	HRD
TCGA-61-2611-02	24	28	15	67	HRD
TCGA-61-2612-01	17	13	6	36	non-HRD
TCGA-61-2613-01	13	15	6	34	non-HRD
TCGA-61-2614-01	17	8	1	26	non-HRD
TCGA-62-8394-01	15	12	3	30	non-HRD
TCGA-62-8395-01	7	7	8	22	non-HRD
TCGA-62-8397-01	4	5	5	14	non-HRD
TCGA-62-8398-01	8	6	5	19	non-HRD
TCGA-62-8399-01	15	13	9	37	non-HRD
TCGA-62-8402-01	9	6	4	19	non-HRD
TCGA-62-A46O-01	26	27	9	62	HRD
TCGA-62-A46P-01	6	4	6	16	non-HRD
TCGA-62-A46R-01	10	6	4	20	non-HRD
TCGA-62-A46S-01	12	7	7	26	non-HRD
TCGA-62-A46U-01	14	11	9	34	non-HRD
TCGA-62-A46V-01	9	11	10	30	non-HRD
TCGA-62-A46Y-01	5	3	6	14	non-HRD
TCGA-62-A470-01	13	6	11	30	non-HRD
TCGA-62-A471-01	16	4	13	33	non-HRD
TCGA-62-A472-01	8	3	4	15	non-HRD
TCGA-63-5128-01	15	7	10	32	non-HRD
TCGA-63-5131-01	25	20	17	62	HRD
TCGA-63-6202-01	16	11	8	35	non-HRD
TCGA-63-7020-01	11	7	7	25	non-HRD
TCGA-63-7021-01	8	4	3	15	non-HRD
TCGA-63-7022-01	3	2	2	7	non-HRD
TCGA-63-7023-01	15	7	16	38	non-HRD
TCGA-63-A5M9-01	28	24	17	69	HRD
TCGA-63-A5MB-01	26	26	22	74	HRD
TCGA-63-A5MG-01	4	5	6	15	non-HRD
TCGA-63-A5MH-01	11	6	12	29	non-HRD
TCGA-63-A5MI-01	21	18	14	53	HRD
TCGA-63-A5MJ-01	21	15	11	47	HRD
TCGA-63-A5ML-01	15	12	13	40	non-HRD
TCGA-63-A5MM-01	3	3	3	9	non-HRD
TCGA-63-A5MN-01	6	4	2	12	non-HRD
TCGA-63-A5MP-01	19	25	16	60	HRD
TCGA-63-A5MR-01	10	2	9	21	non-HRD
TCGA-63-A5MS-01	20	24	12	56	HRD
TCGA-63-A5MT-01	13	13	9	35	non-HRD
TCGA-63-A5MU-01	8	6	7	21	non-HRD
TCGA-63-A5MV-01	19	10	12	41	non-HRD
TCGA-63-A5MW-01	14	15	5	34	non-HRD
TCGA-63-A5MY-01	21	14	19	54	HRD
TCGA-64-1676-01	13	8	13	34	non-HRD
TCGA-64-1677-01	10	14	6	30	non-HRD
TCGA-64-1678-01	18	13	9	40	non-HRD
TCGA-64-1679-01	9	7	5	21	non-HRD
TCGA-64-1680-01	6	3	0	9	non-HRD
TCGA-64-1681-01	14	8	4	26	non-HRD
TCGA-64-5774-01	18	14	10	42	HRD
TCGA-64-5775-01	9	3	4	16	non-HRD
TCGA-64-5778-01	10	6	11	27	non-HRD
TCGA-64-5779-01	20	10	14	44	HRD
TCGA-64-5781-01	6	3	6	15	non-HRD
TCGA-64-5815-01	12	9	10	31	non-HRD
TCGA-66-2727-01	23	19	14	56	HRD
TCGA-66-2734-01	5	1	5	11	non-HRD
TCGA-66-2737-01	9	11	9	29	non-HRD
TCGA-66-2742-01	12	5	4	21	non-HRD
TCGA-66-2744-01	16	17	12	45	HRD
TCGA-66-2753-01	14	12	10	36	non-HRD
TCGA-66-2754-01	19	15	8	42	HRD
TCGA-66-2755-01	13	7	7	27	non-HRD
TCGA-66-2756-01	15	22	10	47	HRD
TCGA-66-2757-01	13	5	11	29	non-HRD
TCGA-66-2758-01	29	25	13	67	HRD
[truncated: 8,648 more rows]
