# Supplementary material for: Inferring Homologous Recombination Deficiency of Ovarian Cancer From the Landscape of Copy Number Variation at Subchromosomal and Genetic Resolutions
Source: Front Oncol. 2021 Dec 16;11:772604. doi: 10.3389/fonc.2021.772604 (PMC8716765; doi:10.3389/fonc.2021.772604)
Supplement: Supplementary Table 4 — HRD status in AOCS cohort. [file Table_4.xlsx]

## Sheet: Sheet1
Patient_ID	HR_gene_alteration	HRD_status
AOCS-001	BRCA1_meth	HRD
AOCS-004		WT
AOCS-005		WT
AOCS-034	GL_BRCA1	HRD
AOCS-055		WT
AOCS-056		WT
AOCS-057	BRCA1_meth	HRD
AOCS-058	GL_BRCA1	HRD
AOCS-059		WT
AOCS-060		WT
AOCS-061		WT
AOCS-063	SM_BRCA2	HRD
AOCS-064	BRCA1_meth	HRD
AOCS-065	GL_BRCA1	HRD
AOCS-075		WT
AOCS-076		WT
AOCS-077		WT
AOCS-078		WT
AOCS-079	SM_BRCA1	HRD
AOCS-080		WT
AOCS-081		WT
AOCS-083		WT
AOCS-084		WT
AOCS-085		WT
AOCS-086	SM_BRCA1	HRD
AOCS-088	GL_BRCA1	HRD
AOCS-090		WT
AOCS-091	BRCA1_meth	HRD
AOCS-092	SM_BRCA1_del	HRD
AOCS-093	BRCA1_meth	HRD
AOCS-094	BRCA1_meth	HRD
AOCS-095	GL_BRCA1	HRD
AOCS-096		WT
AOCS-097		WT
AOCS-104		WT
AOCS-105	GL_BRCA1	HRD
AOCS-106	RAD51C_meth	HRD
AOCS-107	BRCA1_meth	HRD
AOCS-108	GL_BRCA1	HRD
AOCS-109		WT
AOCS-111		WT
AOCS-112		WT
AOCS-113		WT
AOCS-114	GL_BRCA1	HRD
AOCS-115	SM_PTEN_del	HRD
AOCS-116		WT
AOCS-122	SM_BRCA2	HRD
AOCS-123		WT
AOCS-124		WT
AOCS-125	BRCA1_meth	HRD
AOCS-126	GL_RAD51C	HRD
AOCS-128	BRCA1_meth	HRD
AOCS-130	SM_BRCA1	HRD
AOCS-131	GL_BRCA1	HRD
AOCS-132	GL_BRIP1	HRD
AOCS-133	GL_BRIP1	HRD
AOCS-139	GL_BRCA1	HRD
AOCS-143	GL_BRCA1; RAD51C_meth	HRD
AOCS-144	BRCA1_meth	HRD
AOCS-145	GL_BRCA1	HRD
AOCS-146	GL_BRCA1	HRD
AOCS-147	RAD51C_meth; SM_PTEN_del	HRD
AOCS-148	SM_PTEN_del	HRD
AOCS-149	SM_BRCA2	HRD
AOCS-152	SM_BRCA1	HRD
AOCS-153		WT
AOCS-157		WT
AOCS-158	BRCA1_meth	HRD
AOCS-159		WT
AOCS-160		WT
AOCS-161		WT
AOCS-162		WT
AOCS-163		WT
AOCS-164	BRCA1_meth	HRD
AOCS-165		WT
AOCS-166	MMR_mutation	WT
AOCS-168		WT
AOCS-169		WT
AOCS-170	GL_CHEK2	HRD
AOCS-171	SM_BRCA1	HRD
