# Supplementary material for: Inferring Homologous Recombination Deficiency of Ovarian Cancer From the Landscape of Copy Number Variation at Subchromosomal and Genetic Resolutions
Source: Front Oncol. 2021 Dec 16;11:772604. doi: 10.3389/fonc.2021.772604 (PMC8716765; doi:10.3389/fonc.2021.772604)
Supplement: Supplementary Table 5 — Summary of clinical characteristics of TCGA pan-cancer cohort. [file Table_5.xlsx]

## Sheet: Sheet 1
Clinical characteristics	# Patients	Percent (%)
Ethnicity
hispanic or latino	363	0.034375
not hispanic or latino	7959	0.753693
Not reported	2238	0.211932
Gender
female	5499	0.520739
male	5061	0.479261
Race
american indian or alaska native	28	0.00265152
asian	651	0.0616477
black or african american	938	0.0888258
native hawaiian or other pacific islander	13	0.00123106
white	7988	0.756439
Not reported	942	0.0892045
Prior malignancy
no	8618	0.816098
yes	860	0.0814394
Not reported	1082	0.102462
Prior treatment
No	10399	0.984754
Yes	157	0.0148674
Not reported	4	0.000378788
Synchronous malignancy
No	8708	0.824621
Yes	43	0.00407197
Not reported	1809	0.171307
Treatment type
Pharmaceutical Therapy, NOS	5243	0.496496
Radiation Therapy, NOS	5317	0.503504
Stage
Stage 0	7	0.000662879
Stage I	2011	0.190436
Stage II	2131	0.201799
Stage III	1690	0.160038
Stage IV	867	0.0821023
Stage X	12	0.00113636
Not reported	3842	0.363826
