# Supplementary material for: Inferring Homologous Recombination Deficiency of Ovarian Cancer From the Landscape of Copy Number Variation at Subchromosomal and Genetic Resolutions
Source: Front Oncol. 2021 Dec 16;11:772604. doi: 10.3389/fonc.2021.772604 (PMC8716765; doi:10.3389/fonc.2021.772604)
Supplement: Supplementary Table 6 — Summary of cancer types and HRD score in TCGA pan-cancer cohort. [file Table_6.xlsx]

## Sheet: Sheet 1
Cancer_type	N	N(HRD<42)	N(HRD≥42)	Average_HRD_Score
OV	558	246	312	47.0054
LUSC	496	333	163	34.6089
ESCA	162	112	50	34.0556
UCS	56	37	19	33.4821
SARC	244	172	72	30.0943
BLCA	402	318	84	27.7736
LUAD	506	428	78	25.6838
BRCA	1049	848	201	25.4376
STAD	432	332	100	24.5995
HNSC	515	462	53	24.3398
CHOL	36	35	1	21.8611
CESC	294	277	17	20.2347
MESO	81	79	2	18.5926
SKCM	464	449	15	18.069
LIHC	364	355	9	17.6291
TGCT	133	133	0	15.9699
PAAD	165	160	5	15.4848
READ	163	161	2	15.4663
DLBC	47	46	1	14.5532
UCEC	531	480	51	13.0452
ACC	90	85	5	12.3111
PRAD	472	467	5	12.0064
COAD	444	437	7	11.732
GBM	558	558	0	8.77419
LGG	509	508	1	8.53045
PCPG	161	161	0	7.46584
KIRC	501	499	2	6.05589
UVM	80	80	0	5.3125
THYM	107	107	0	3.28037
KIRP	285	284	1	3.21754
KICH	66	66	0	2.68182
LAML	124	124	0	2.33871
THCA	465	465	0	0.470968
